1 **Into the deep (sequence) of the foot-and-mouth disease virus gene pool: bottlenecks and**  
2 **adaptation during infection in naïve and vaccinated cattle**

3

4

5 Ian Fish<sup>1,2</sup>, Carolina Stenfeldt<sup>1,3</sup>, Rachel M. Palinski<sup>1</sup>, Steven J. Pauszek<sup>1</sup>, Jonathan Arzt<sup>1, #</sup>

6

7 <sup>1</sup> Foreign Animal Disease Research Unit, Plum Island Animal Disease Center, ARS, USDA, NY,

8 USA

9 <sup>2</sup> Oak Ridge Institute for Science and Education, PIADC Research Participation Program, Oak

10 Ridge, TN, USA

11 <sup>3</sup> College of Veterinary Medicine, Kansas State University, Manhattan, KS, USA

12

13 #Correspondence: [Jonathan.Arzt@ars.usda.gov](mailto:Jonathan.Arzt@ars.usda.gov)

14

15 Abstract

16

17 Foot-and-mouth disease virus (FMDV), like many RNA viruses, infects hosts as a population of  
18 closely related viruses referred to as a quasispecies. The behavior of this quasispecies has not  
19 been described in detail over the full course of infection in a natural host species. In this study,  
20 virus samples taken from vaccinated and non-vaccinated cattle up to 35 days post experimental  
21 infection with FMDV A24-Cruzeiro were analyzed by deep-sequencing. Vaccination induced  
22 significant differences compared to viruses from non-vaccinated cattle. in virus substitution  
23 rates, entropy, and evidence for adaptation. Genomic variation detected during early infection  
24 was found to reflect the diversity inherited from the source virus (inoculum), whereas by 12 days  
25 post infection (dpi) dominant viruses were defined by newly acquired mutations. In most serially  
26 sampled cattle, mutations conferring recognized fitness gain occurred within numerous genetic  
27 backgrounds, often associated with selective sweeps. Persistent infections always included  
28 multiple FMDV subpopulations, suggesting independently maintained foci of infection within  
29 the nasopharyngeal mucosa. Although vaccination prevented disease, subclinical infection in this  
30 group was associated with very early bottlenecks which subsequently reduced the diversity  
31 within the virus population. This implies an added consequence of vaccination in the control of  
32 foot-and-mouth disease. Viruses sampled from both animal cohorts contained putative antigenic  
33 escape mutations. However, these mutations occurred during later stages of infection, at which  
34 time transmission between animals is less likely to occur.

35

36 Importance

37

38 Preparedness and control of foot-and-mouth disease virus have substantial, yet distinct  
39 implications in endemic and free regions. Viral evolution and emergence of novel strains are of  
40 critical concern in both settings. The factors that contribute to the asymptomatic carrier state, a  
41 common form of long-term FMDV infection in cattle and other species, are important but not  
42 well-understood. This experimental study of foot-and-mouth disease virus in cattle explored the  
43 evolution of the pathogen through detailed sampling and analytical methods in both vaccinated  
44 and non-vaccinated hosts. Significant differences were identified between the viruses  
45 subclinically infecting vaccinated animals and those causing clinical disease in the non-  
46 vaccinated cohort. These results can benefit vaccination programs and contribute to the  
47 understanding of persistent infection of cattle.

48

## 49 Introduction

50

51 Foot-and-mouth disease (FMD) is a viral disease affecting even-toed ungulates, causing  
52 economically devastating effects on animal production and international trade [1-3]. Though  
53 Europe and the Americas have largely eliminated FMD, the disease remains a substantial  
54 concern for livestock farmers in much of the world [4]. The clinical form of FMD manifests with  
55 fever, lameness and characteristic vesicular lesions on the feet, oral cavities and teats, thereby  
56 negatively impacting animal welfare and herd productivity [2, 5]. The economic impacts  
57 associated with decreased production, disease surveillance, trade restrictions and vaccination  
58 campaigns comprise a large burden to FMD-endemic and neighboring countries [3].

59

60 The etiologic agent of FMD, foot-and-mouth disease virus (FMDV) (family: *Picornaviridae*,  
61 genus: *Aphthovirus*) is a single-stranded positive-sense RNA virus with a particularly high  
62 mutation rate [6]. The approximately 8.3 kb genome includes a 7 kb open reading frame  
63 encoding a polyprotein that is post-translationally processed into four structural and eleven non-  
64 structural proteins including two forms of Leader protease (Lpro) and three copies of VPg [5, 7].  
65 High levels of variation, often associated with positive selection and antigenic escape, are  
66 commonly detected in the capsid protein coding regions [8-10]. The GH loop in capsid protein  
67 VP1 is particularly important for host cell entry and antibody-mediated neutralization [11, 12].  
68 Specifically, the Arg-Gly-Asp (RGD) motif within this GH loop interacts directly with the host  
69 cell integrin receptors (e.g.  $\alpha\beta6$ ) [Reviewed in 13].

70

71 Like many RNA viruses, FMDV naturally exists as a population with a complex depth of genetic  
72 variation, i.e. as a quasispecies. In recent years, next-generation sequencing technology has  
73 enabled subconsensus-level characterization of this complex viral population [14-17]. Viral  
74 population diversity and availability of low frequency mutations have been demonstrated to  
75 mediate viral swarm adaptability, fitness and ultimately virulence [18-20]. The relevance of the  
76 FMDV quasispecies swarm has been extensively investigated in cell culture [reviewed in 21].  
77 Those studies have shown that events that disrupt the quasispecies can affect virus adaptation  
78 and virulence. Relating understanding of the FMDV quasispecies *in vitro* to swarm behavior in  
79 natural host species is an important goal as it relates to infection progression, differential  
80 virulence, and mechanisms mediating immunity in vaccinated and non-vaccinated hosts.

81

82 The path to improved FMD countermeasures may depend upon elucidation of viral and host  
83 determinants of FMDV evolution. Delineating differences in viral genetic change in response to  
84 both primed (vaccinated) and unprimed host humoral immunity are of particular interest as  
85 conventional FMD vaccines do not prevent subclinical or persistent infection. In cattle, both  
86 primary and persistent infection have been localized to the nasopharyngeal mucosa [22-25]. In  
87 non-vaccinated animals, acute FMDV infection lasts approximately one to two weeks, and  
88 involves systemic dissemination of virus and transient viremia [26]. The clinical phase of  
89 disease is followed by a transitional period during which the virus is completely cleared in a  
90 subset of animals that do not maintain persistent infection (herein referred to as terminators)  
91 [25]. Persistent FMDV infection is defined by the presence of infectious FMDV in  
92 oropharyngeal fluid samples four or more weeks after infection [27]. Appropriately vaccinated  
93 animals are generally protected against systemic generalization of virus and clinical FMD.  
94 However, these vaccinated animals often become subclinically infected and traverse the  
95 corresponding phases of early, transitional, and persistent infection, during which viral  
96 replication is fully restricted to the nasopharynx (upper respiratory tract).

97

98 The present study investigated the evolution of FMDV populations within natural hosts by  
99 examining the deep sequences of viruses sampled through 35 days following experimental  
100 infection of naïve and vaccinated cattle [17, 24, 25]. This study identified changes in the viral  
101 swarm, the influence of bottlenecks and adaptive immunity and the respective roles of novel  
102 subconsensus mutations. The results of this study suggest that vaccination causes earlier  
103 bottlenecks in FMDV populations as compared to the viruses present in their non-vaccinated  
104 counterparts and that antigenic escape along with other novel mutations, occur during the

105 persistent phase of infection. These findings enhance understanding of FMDV evolution *in vivo*  
106 and may contribute to development of improved FMD vaccines.

107

108

109 Results

110

111 *Animal experiments and clinical outcomes*

112 The 10 non-vaccinated cattle included in the study all developed fulminant clinical FMD after  
113 virus exposure. The 10 vaccinated animals were protected from clinical disease but were  
114 subclinically infected as demonstrated by repeated recovery of virus from clinical samples.

115 Details of clinical symptoms, infection dynamics, and tissue distribution of FMDV in these cattle  
116 have been published previously [24, 25]. Half of the animals (5 vaccinated and 5 non-vaccinated)  
117 were euthanized between 1 and 10 days post inoculation (dpi) for harvest of tissue samples  
118 (Figure S1) while the remainder of the animals were sampled through 35 dpi. Among the 10  
119 cattle followed through study-end, seven were determined to be persistently infected with FMDV  
120 (carriers) while three individuals (animal IDs 14-108, 14-111, and 14-57) fully cleared infection  
121 (terminators) during the transitional phase of infection.

122

123

124 *Effects of vaccination on FMDV populations*

125

126 The rate of FMDV genomic change over time was compared between vaccinated and non-  
127 vaccinated cohorts in order to investigate if vaccination induced selective pressures upon the

128 inoculating virus population which were distinct from those which occurred in naïve (non-  
 129 vaccinated) animals. In order to quantitate this effect, pairwise differences over time were first  
 130 calculated between each FMDV sample's consensus sequence and the preceding sequence  
 131 obtained from the same animal (inoculum used as 0 dpi). Viruses in non-vaccinated animals had  
 132 higher substitution rates than the viruses in the vaccinated cohort during early- (0.188 vs. 0.131  
 133 substitutions/site/year (subs/st/yr)) and transitional (0.127 vs. 0.089 subs/st/yr) phases of  
 134 infection; however, these differences between groups were not statistically significant (Table 1).  
 135 While the substitution rates decreased with advancing phase of infection for synonymous and  
 136 nonsynonymous sites (Table 1, Figure S2), this change was only statistically significant for the  
 137 non-vaccinated cohort between early infection (0.188 subs/st/yr) and persistent infection (0.080  
 138 subs/st/yr,  $P < 0.05$ ). Specifically, nonsynonymous changes had the highest observed substitution  
 139 rate change between early and persistent phases of infection (Figure S2,  $P < 0.005$ ). These data  
 140 suggest that the non-vaccinated cattle maintain a large, diverse and dynamic virus population  
 141 during early infection which evolves more slowly during later stages. During the persistent phase  
 142 of infection, FMDV genomic rates of change in non-vaccinated and vaccinated cattle were  
 143 similar.

144

145 **Table 1.** Nucleotide substitution rates and Shannon entropy for FMDV samples

146

|                    | substitution rate (subs/st/yr) |              |                    | Shannon entropy     |                     |                     |                   |
|--------------------|--------------------------------|--------------|--------------------|---------------------|---------------------|---------------------|-------------------|
|                    | early                          | transitional | persistent         | CDS                 | nonstructural       | capsid              | capsid / CDS      |
| inoculum           | -                              | -            | -                  | 0.0156              | 0.0147              | 0.0181              | 1.16              |
| non-vaccin. cattle | 0.188 <sup>a</sup>             | 0.127        | 0.080 <sup>a</sup> | 0.0171 <sup>b</sup> | 0.0160 <sup>b</sup> | 0.0200 <sup>b</sup> | 1.17 <sup>b</sup> |
| vaccinated cattle  | 0.131                          | 0.089        | 0.079              | 0.0120 <sup>b</sup> | 0.0115 <sup>b</sup> | 0.0130 <sup>b</sup> | 1.08 <sup>b</sup> |

147 <sup>a</sup> =  $P < 0.05$ ; <sup>b</sup> =  $P < 0.001$ ; subs/st/yr: substitutions / site / year. CDS: coding region.

148  
149

## 150 *Entropy*

151 Deep sequence analyses of the sampled FMDV populations allowed for estimation of Shannon  
152 entropy. This provided a site-specific quantitation of nucleotide variation for each sampled virus,  
153 calculated from aligned sequencing reads and averaged across distinct genomic regions. Entropy  
154 for the protein coding region (CDS) of the inoculum was 0.0156, which was greater than that of  
155 nearly all vaccinated cattle samples, indicating higher diversity (mean 0.0120, median 0.0110,  
156 Table 1 and Figure 1). This evidence aligns with a previous analysis of the multi-haplotypic  
157 composition of this inoculum [17]. The CDS average entropy across all samples from non-  
158 vaccinated cattle (mean 0.0171, median 0.0169), was similar to the inoculum. The average dpi-  
159 matched non-vaccinated sample entropies were significantly ( $P < 0.001$ ) higher than samples  
160 from vaccinated cattle across the full CDS, as well as for the capsid and nonstructural coding  
161 regions separately (Table 1). Since coding region entropies did not significantly change within  
162 either cohort over time (Figure 1), non-vaccinated cattle maintained significantly higher average  
163 entropies than vaccinated cattle through all phases of infection (Table 1). These data suggest a  
164 strong, early and enduring reduction in FMDV population diversity, i.e. an early bottleneck in  
165 the vaccinated animals. In contrast, there was little or no evidence of reduction in diversity or  
166 effective population size during initial infection of non-vaccinated cattle (Tables 1 and S2).

167

168 Average site-wise entropy across the capsid coding regions for VP1, VP2, and VP3 was  
169 calculated in proportion to the overall CDS entropy (capsid / CDS entropy, Table 1); this allowed  
170 for comparison between samples of capsid entropy proportional to each sample's global (CDS)  
171 diversity. Averaged across all phases of infection, capsid/CDS entropy values of the viral



|                | animal ID    | DPI      | CDS    | nonstruc. | capsid | capsid/CDS | avg. coverage |        |
|----------------|--------------|----------|--------|-----------|--------|------------|---------------|--------|
| non-vaccinated | 14-33        | 1_dpi    | 0.0158 | 0.0150    | 0.0177 | 1.13       | 3174          |        |
|                | 14-33        | 2_dpi    | 0.0154 | 0.0142    | 0.0186 | 1.21       | 2034          |        |
|                | 14-33        | 3_dpi    | 0.0176 | 0.0165    | 0.0204 | 1.16       | 1298          |        |
|                | 14-33        | 4_dpi    | 0.0151 | 0.0138    | 0.0183 | 1.22       | 3280          |        |
|                | 14-33        | 6_dpi    | 0.0152 | 0.0140    | 0.0182 | 1.20       | 2730          |        |
|                | 14-33        | 10_dpi_r | 0.0133 | 0.0129    | 0.0143 | 1.08       | 1069          |        |
|                | 14-33        | 21_dpi   | 0.0154 | 0.0142    | 0.0185 | 1.20       | 3574          |        |
|                | 14-33        | 29_dpi   | 0.0173 | 0.0161    | 0.0205 | 1.18       | 5378          |        |
|                | 14-34        | 1_dpi    | 0.0151 | 0.0141    | 0.0177 | 1.17       | 4043          |        |
|                | 14-34        | 2_dpi    | 0.0146 | 0.0133    | 0.0178 | 1.22       | 3430          |        |
|                | 14-34        | 3_dpi    | 0.0183 | 0.0178    | 0.0198 | 1.08       | 1614          |        |
|                | 14-34        | 4_dpi    | 0.0145 | 0.0137    | 0.0166 | 1.14       | 3602          |        |
|                | 14-34        | 5_dpi    | 0.0160 | 0.0147    | 0.0194 | 1.21       | 98100         |        |
|                | 14-34        | 6_dpi    | 0.0169 | 0.0162    | 0.0189 | 1.12       | 119659        |        |
|                | 14-34        | 7_dpi    | 0.0175 | 0.0171    | 0.0185 | 1.06       | 91384         |        |
|                | 14-34        | 8_dpi    | 0.0160 | 0.0154    | 0.0177 | 1.10       | 96647         |        |
|                | 14-34        | 9_dpi    | 0.0176 | 0.0171    | 0.0189 | 1.07       | 152331        |        |
|                | 14-34        | 28_dpi   | 0.0179 | 0.0163    | 0.0221 | 1.23       | 1133          |        |
| 14-34          | 31_dpi       | 0.0171   | 0.0154 | 0.0214    | 1.25   | 4557       |               |        |
| non-vaccinated | 14-49        | 2_dpi    | 0.0261 | 0.0239    | 0.0317 | 1.22       | 99169         |        |
|                | 14-49        | 6_dpi    | 0.0215 | 0.0211    | 0.0223 | 1.04       | 154576        |        |
|                | 14-49        | 10_dpi   | 0.0210 | 0.0203    | 0.0228 | 1.08       | 120842        |        |
|                | 14-108       | 0.25_dpi | 0.0192 | 0.0177    | 0.0230 | 1.20       | 3332          |        |
|                | 14-108       | 0.5_dpi  | 0.0172 | 0.0155    | 0.0215 | 1.25       | 3554          |        |
|                | 14-108       | 0.75_dpi | 0.0149 | 0.0139    | 0.0175 | 1.18       | 4413          |        |
|                | 14-108       | 1_dpi    | 0.0203 | 0.0185    | 0.0249 | 1.23       | 2993          |        |
|                | 14-108       | 3_dpi    | 0.0200 | 0.0190    | 0.0227 | 1.13       | 3795          |        |
|                | 14-108       | 5_dpi    | 0.0122 | 0.0126    | 0.0112 | 0.92       | 368           |        |
|                | 14-108       | 8_dpi    | 0.0143 | 0.0132    | 0.0172 | 1.20       | 3410          |        |
|                | 14-108       | 10_dpi   | 0.0135 | 0.0121    | 0.0172 | 1.27       | 715           |        |
|                | 14-110       | 0.17_dpi | 0.0172 | 0.0155    | 0.0216 | 1.26       | 6031          |        |
|                | 14-110       | 0.42_dpi | 0.0165 | 0.0146    | 0.0213 | 1.30       | 826           |        |
|                | 14-110       | 0.75_dpi | 0.0195 | 0.0185    | 0.0218 | 1.12       | 2551          |        |
|                | 14-110       | 0.88_dpi | 0.0199 | 0.0184    | 0.0238 | 1.19       | 1255          |        |
|                | 14-110       | 2_dpi    | 0.0151 | 0.0140    | 0.0177 | 1.18       | 4298          |        |
|                | 14-110       | 3_dpi    | 0.0161 | 0.0149    | 0.0191 | 1.19       | 3380          |        |
|                | 14-110       | 8_dpi    | 0.0188 | 0.0181    | 0.0206 | 1.10       | 4919458       |        |
| 14-110         | 14_dpi       | 0.0118   | 0.0113 | 0.0132    | 1.12   | 129333     |               |        |
| 14-110         | 17_dpi       | 0.0159   | 0.0138 | 0.0214    | 1.35   | 118564     |               |        |
| 14-110         | 28_dpi_r     | 0.0184   | 0.0181 | 0.0191    | 1.04   | 1331       |               |        |
| 14-110         | 35_dpi       | 0.0157   | 0.0145 | 0.0188    | 1.20   | 2589       |               |        |
| non-vaccinated | 14-111       | 0.17_dpi | 0.0174 | 0.0159    | 0.0215 | 1.23       | 4149          |        |
|                | 14-111       | 0.42_dpi | 0.0182 | 0.0167    | 0.0222 | 1.22       | 5601          |        |
|                | 14-111       | 0.75_dpi | 0.0198 | 0.0183    | 0.0234 | 1.19       | 3209          |        |
|                | 14-111       | 0.88_dpi | 0.0181 | 0.0169    | 0.0210 | 1.16       | 338           |        |
|                | 14-111       | 2_dpi    | 0.0195 | 0.0187    | 0.0218 | 1.11       | 3153          |        |
|                | 14-111       | 3_dpi    | 0.0224 | 0.0208    | 0.0266 | 1.19       | 3770          |        |
|                | 14-111       | 7_dpi    | 0.0164 | 0.0152    | 0.0195 | 1.19       | 4092          |        |
|                | 14-111       | 8_dpi    | 0.0162 | 0.0151    | 0.0189 | 1.17       | 3747          |        |
|                | 14-111       | 9_dpi    | 0.0148 | 0.0137    | 0.0178 | 1.20       | 1702          |        |
|                | 14-111       | 10_dpi   | 0.0162 | 0.0148    | 0.0199 | 1.23       | 587           |        |
|                | non-vax avg: |          |        | 0.0171    | 0.0160 | 0.0200     | 1.17          |        |
|                | vaccinated   | 14-50    | 2_dpi  | 0.0083    | 0.0080 | 0.0090     | 1.09          | 8634   |
|                |              | 14-51    | 2_dpi  | 0.0087    | 0.0085 | 0.0093     | 1.06          | 12933  |
|                |              | 14-57    | 2_dpi  | 0.0134    | 0.0126 | 0.0156     | 1.17          | 4839   |
|                |              | 14-57    | 3_dpi  | 0.0152    | 0.0144 | 0.0173     | 1.14          | 6938   |
|                |              | 15-12    | 1_dpi  | 0.0153    | 0.0143 | 0.0178     | 1.16          | 2275   |
|                |              | 15-12    | 2_dpi  | 0.0146    | 0.0134 | 0.0176     | 1.21          | 4373   |
|                |              | 15-12    | 3_dpi  | 0.0153    | 0.0148 | 0.0166     | 1.09          | 137552 |
| 15-12          |              | 28_dpi   | 0.0170 | 0.0166    | 0.0180 | 1.06       | 117464        |        |
| 15-12          |              | 35_dpi   | 0.0140 | 0.0135    | 0.0153 | 1.10       | 146728        |        |
| 15-13          |              | 7_dpi    | 0.0093 | 0.0092    | 0.0096 | 1.02       | 154975        |        |
| 15-13          |              | 14_dpi   | 0.0095 | 0.0093    | 0.0100 | 1.05       | 128923        |        |
| 15-14          |              | 5_dpi    | 0.0093 | 0.0093    | 0.0092 | 0.99       | 74267         |        |
| 15-14          |              | 17_dpi   | 0.0089 | 0.0088    | 0.0091 | 1.03       | 138526        |        |
| 15-14          |              | 28_dpi   | 0.0110 | 0.0107    | 0.0117 | 1.06       | 113413        |        |
| 1551           |              | 8_dpi    | 0.0095 | 0.0096    | 0.0095 | 0.99       | 2238          |        |
| vax avg:       |              |          | 0.0120 | 0.0115    | 0.0130 | 1.08       |               |        |
| all avg:       |              |          | 0.0159 | 0.0149    | 0.0184 | 1.15       |               |        |
| inoculum       |              |          | 0.0156 | 0.0147    | 0.0181 | 1.16       | 10443755      |        |
| non-carriers*: |              |          | 0.0148 | 0.0138    | 0.0174 | 1.17       |               |        |
| carriers*:     |              |          | 0.0169 | 0.0162    | 0.0186 | 1.11       |               |        |

**Figure 1.** Average Shannon entropy in sample FMDV coding regions. Abbreviations: dpi: days post infection, CDS: coding sequence, nonstruc.: nonstructural gene coding regions (including VP4), capsid: VP1, VP2, and VP3 coding regions. Heat coloring indicates relative values with red denoting higher and blue denoting lower. \*Non-vaccinated only, dpi-matched (5-14 dpi) samples averaged for non-carriers and carriers. Animals with undetermined carrier status (14-49, 14-50 and 14-51) were sacrificed at 10 dpi or earlier.

172 populations were significantly higher in non-vaccinated animals (1.17,  $P < 0.001$ ) than in  
173 vaccinated animals (1.08, Table 1). This suggests that the early immune response, which had  
174 been primed in the vaccinated animals, more strongly reduced relative capsid diversity in these  
175 hosts and that this took place rapidly following infection; this was also consistent with  
176 population bottlenecks. Notably, there was no significant difference in entropy or relative capsid  
177 entropy based upon the phase of infection (time) within either cohort ( $P > 0.05$ ). This suggested  
178 that reduced FMDV diversity in vaccinated animals was sustained through the phases of  
179 infection examined herein. For non-vaccinated animals, this suggests that substantial population  
180 diversity is maintained despite the reduction in total virus load associated with the clearance of  
181 generalized infection and virus restriction to the nasopharynx during persistent infection. This is  
182 consistent with previous reports of FMDV population diversity detected during persistent  
183 infection [28, 29].

184

#### 185 *Haplotypic population structure*

186

187 The inoculum used to infect the animals in this study was derived from pooled vesicular lesion  
188 samples from multiple cattle which resulted in a highly heterogeneous virus population. As  
189 previously reported for a subset of the current samples, multiple haplogroups originating in the  
190 inoculum were detected at consensus level within samples derived from different animals at  
191 different times after infection [17]. The phylogenetic relationship between these viruses was  
192 assessed by maximum likelihood (Figure 2) and six haplogroups (A through F) were assigned  
193 based on phylogenetic clustering and inferred ancestral relationships.

194

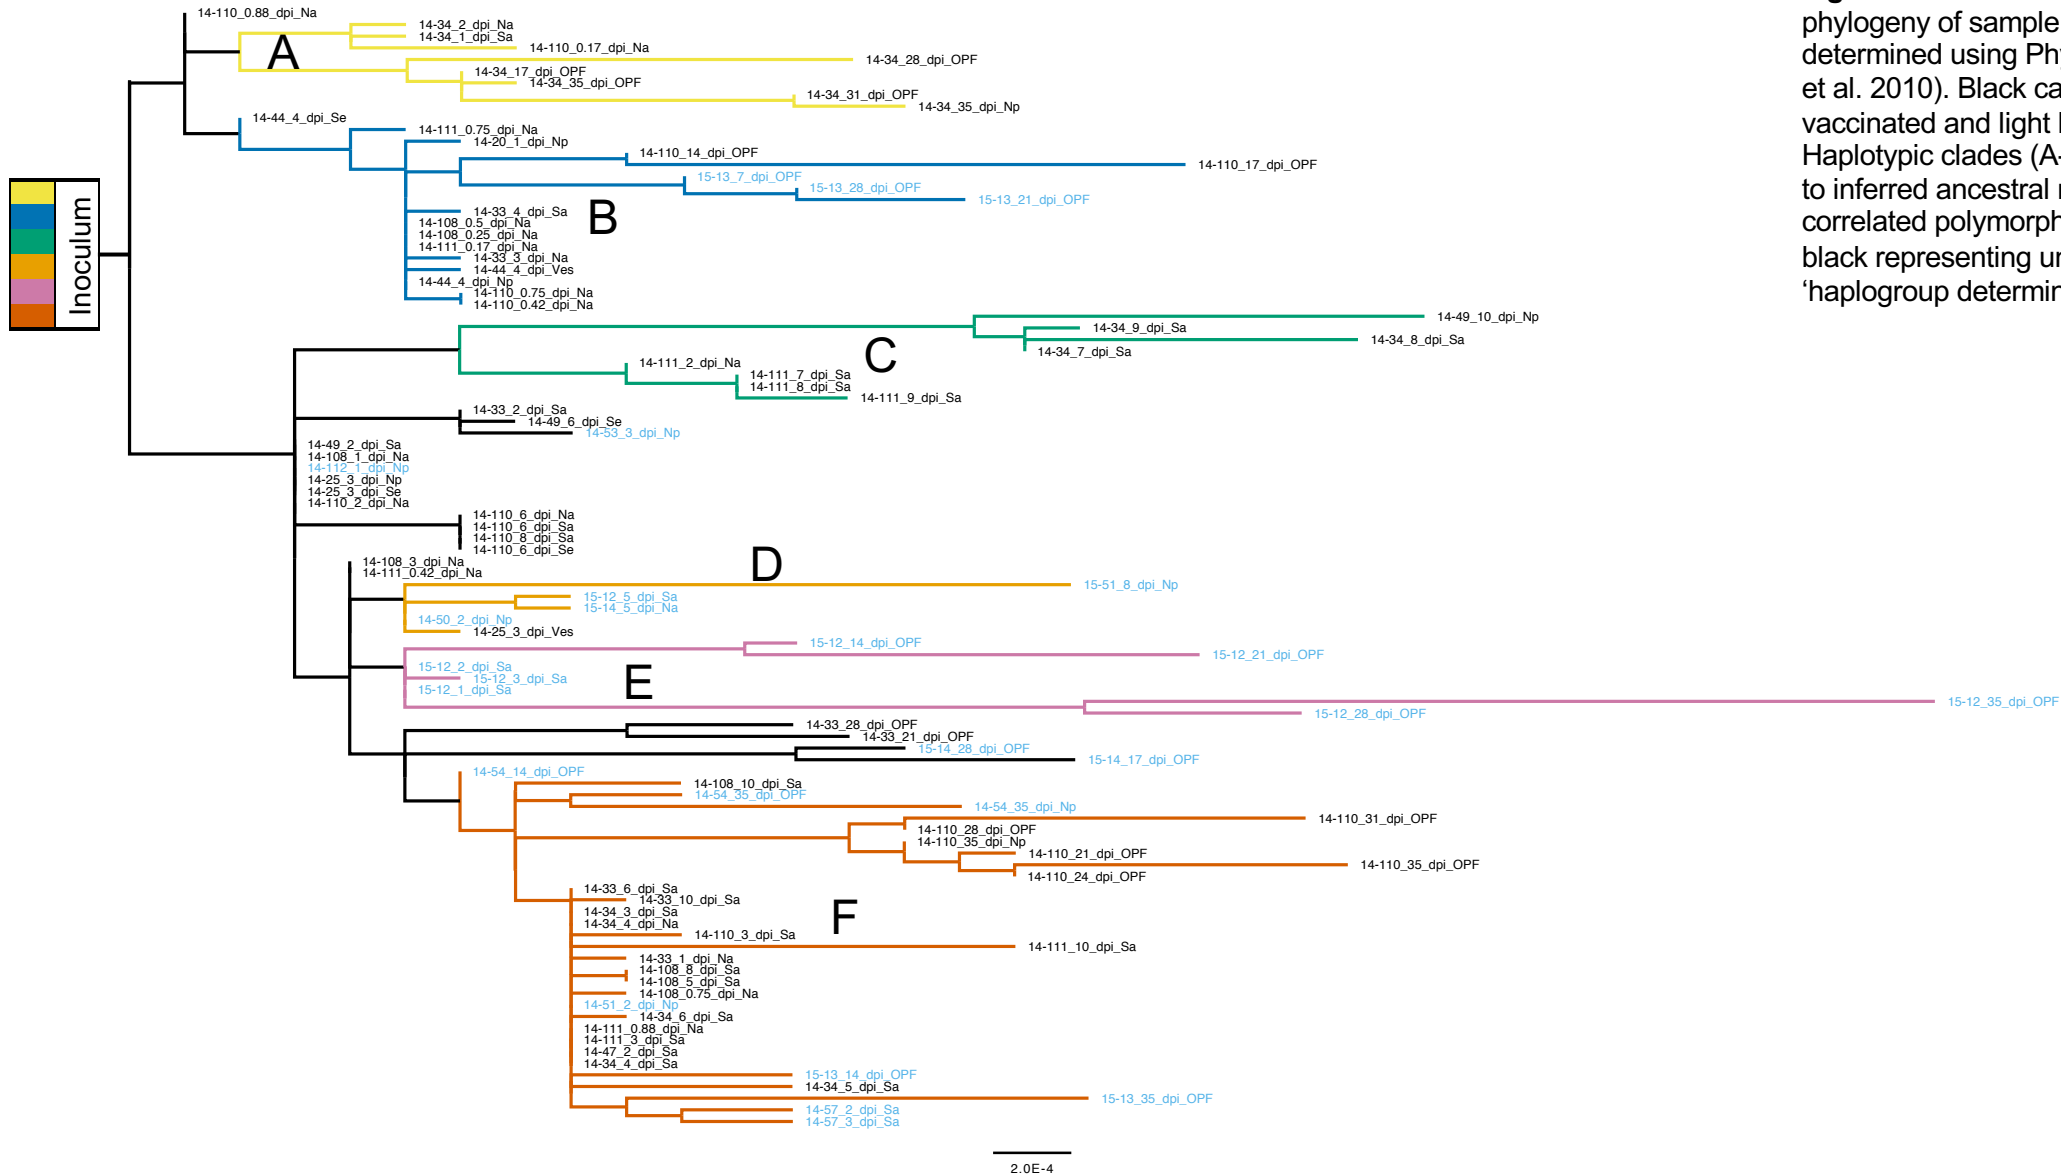

**Figure 2.** Inoculum-rooted maximum likelihood phylogeny of sample consensus sequences determined using PhyML (Guindon, Dufayard et al. 2010). Black cattle IDs are non-vaccinated and light blue are vaccinated. Haplotypic clades (A-F) are colored according to inferred ancestral relationships and correlated polymorphism frequencies with black representing unclassified (see 'haplogroup determination' in methods).

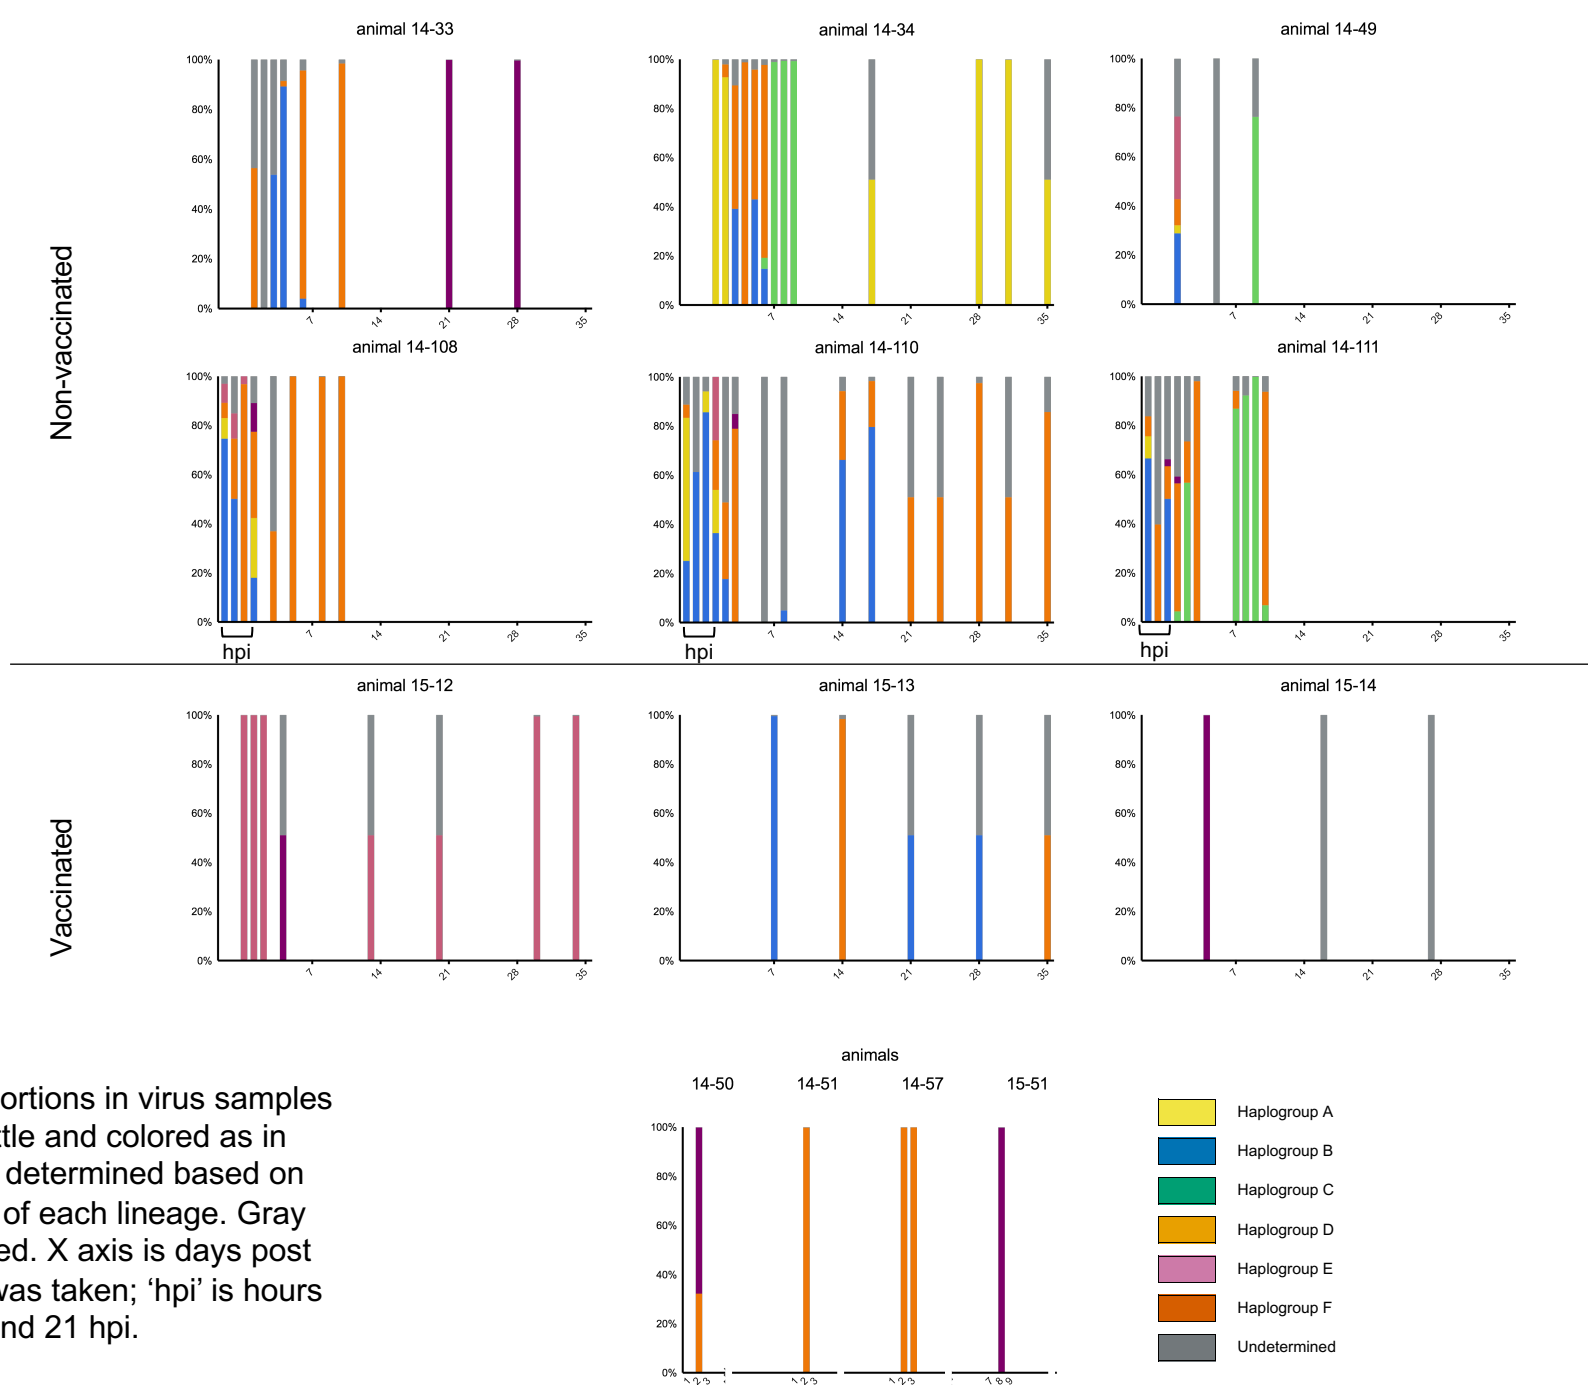

**Figure 3.** Haplogroup proportions in virus samples from 9 serially-sampled cattle and colored as in Figure 2. Proportions were determined based on SNP profiles characteristic of each lineage. Gray indicates lineage unidentified. X axis is days post infection at which sample was taken; 'hpi' is hours post infection, between 4 and 21 hpi.

195 Polymorphisms present at  $\geq 2\%$  (Table S1) were assessed for all deep-sequenced samples (75 of  
196 103 total samples; see Figure S1). Sets of single nucleotide polymorphisms (SNPs) characteristic  
197 of haplogroups A-F were used to classify subpopulations present within samples (Figure 3).  
198 Non-vaccinated cattle's acute phase virus populations were highly haplotypically diverse, while  
199 vaccinated host samples tended to include only single haplotypes. In addition to haplotypic  
200 polymorphism, abundant variation  $\geq 2\%$  was regularly detected in virus populations (Table S1).  
201 Overall, substantially less genetic diversity was detected in samples derived from vaccinated- as  
202 compared to non-vaccinated animals. Samples isolated from non-vaccinated hosts were in daily  
203 flux through the early days of infection and regularly included viruses belonging to multiple  
204 haplogroups. For example, in animal 14-34, group A viruses dominated samples from 1 and 2  
205 dpi, group B and F viruses co-dominated at 3 dpi and group F viruses dominated at 4 dpi (Figure  
206 3). This is consistent with the high entropy and elevated rates of substitution measured for these  
207 animals (Table 1, Figure 1 and Figure S2). In contrast, virus populations in vaccinated cattle  
208 typically contained a single haplogroup and less polymorphism overall (Figure 3 and Table S1).  
209  
210 As both animal cohorts (vaccinated and non-vaccinated) progressed to the persistent phase of  
211 infection, within-host haplotypic diversity decreased, with each persistent phase sample  
212 containing viruses belonging to only a single haplogroup (Figure 3). The one exception to this  
213 was animal 15-13's persistent phase samples that sequentially included viruses belonging to  
214 either groups B or F. Across animals, no specific haplogroup dominated for any particular time  
215 range or cohort, thus no objective fitness advantage was detected between haplogroups. Despite  
216 haplotypic stabilization in later stages of infection, population diversity as indicated by  
217 subconsensus polymorphism did not decrease over time (Table S1). Rather, population diversity

218 was either maintained or increased through the persistent phase of infection. Specifically, OPF  
219 samples at 28 dpi from animals 14-34, 14-110, 15-12, and 15-14 all included substantial  
220 assortments of SNPs at frequencies between 10 and 49% (11-24 SNPs each, Table S1).

221

### 222 *Genomic evolution of the viral swarm*

223

224 The site-specific heterogeneity within the initial infecting population (inoculum) was assessed  
225 and compared to consensus sequences of samples collected from the infected animals. Across the  
226 inoculum CDS, ultra-deep sequencing (10.4 million reads) indicated 217 variable sites encoding  
227 220 single nucleotide variants (SNVs) at frequencies  $\geq 0.5\%$ , three of which had multiple  
228 polymorphisms at the same site (Table S2). Twenty-seven (12.3%) of these SNVs were  
229 identified at the consensus level in cattle samples (Figure 4). All SNPs that were present at high  
230 frequency ( $>10\%$ ) in the inoculum, 14 in total, were detected at the consensus level in multiple  
231 samples (Table S2); this is consistent with genetic drift contributing to the dominance of specific  
232 genotypes. As a gross means of measuring the influence of ancestral variation compared to novel  
233 mutation over time, inoculum minority variants ( $\geq 0.5\%$ ) present in sample consensus sequences  
234 (ancestral SNPs) on each sampling date were measured proportionally to those SNPs not  
235 detected in the inoculum (novel SNPs) (Figure 5). Within the first week of infection, the majority  
236 of SNPs in virus consensus sequences were ancestral, i.e. already present in the founding  
237 populations. The rate of loss of ancestral SNPs and gain of novel SNPs were comparable  
238 between non-vaccinated and vaccinated cattle (not shown). At approximately 10 days after  
239 infection, novel SNPs became equally common to ancestral SNPs.

240

**Figure 4.** Variable FMDV capsid amino acids and positively-selected sites combined. <sup>a</sup> Presence of positively-selected sites identified in individual serially-sampled cattle using mixed effects model of evolution (MEME) analysis ( $P \leq 0.10$ ) (Murrell et al. 2012). <sup>b</sup> Amino acids identified as variable between viruses at the consensus level in VP1, VP2, and VP3 capsid coding regions.

|      | Gene Position | Inoculum Consensus | Variant 1 | Variant 2 | Variant 3 | Variant % in inoculum | MEME <sup>a</sup> N = 9 | Naïve <sup>b</sup> N = 10 | Vaccinated <sup>b</sup> N = 10 |
|------|---------------|--------------------|-----------|-----------|-----------|-----------------------|-------------------------|---------------------------|--------------------------------|
| Lpro | 11            | V                  | A         |           |           |                       | 1                       | 1                         |                                |
|      | 22            | L                  | P         |           |           | 4.4                   | 1                       |                           |                                |
|      | 81            | E                  | K         |           |           | 1.2                   | 1                       | 1                         |                                |
|      | 107           | I                  | P         |           |           |                       | 1                       |                           |                                |
|      | 122           | H                  | Y         |           |           |                       | 1                       |                           |                                |
| VP2  | 44            | A                  | T         |           |           |                       | 1                       | 1                         |                                |
|      | 65            | Y                  | C         | S         |           |                       | 1                       |                           |                                |
|      | 78            | L                  | M         |           |           |                       |                         |                           | 1                              |
|      | 82            | E                  | K         |           |           |                       |                         |                           | 1                              |
|      | 88            | H                  | N         |           |           |                       | 1                       |                           | 1                              |
| 131  | E             | G                  |           |           |           |                       |                         | 1                         |                                |
| VP3  | 65            | T                  | N         |           |           |                       | 1                       |                           |                                |
|      | 70            | D                  | A         | N         | G         |                       | 2                       | 2                         |                                |
|      | 99            | T                  | A         |           |           |                       | 1                       | 1                         |                                |
|      | 111           | F                  | V         |           |           |                       | 1                       |                           |                                |
|      | 131           | E                  | K         | G         |           | 23 (K)                |                         | 7                         | 1                              |
|      | 175           | T                  | K         |           |           |                       |                         |                           | 2                              |
| 220  | Q             | R                  |           |           |           |                       | 2                       |                           |                                |
| VP1  | 96            | S                  | T         |           |           |                       |                         | 1                         |                                |
|      | 131           | N                  | S         |           |           |                       | 1                       |                           |                                |
|      | 142           | G                  | R         |           |           |                       | 1                       | 1                         |                                |
|      | 144           | S                  | R         |           | G         |                       | 3                       | 5                         | 2                              |
|      | 147           | T                  | M         |           |           |                       | 1                       | 9                         | 9                              |
|      | 149           | S                  | A         |           | Y         |                       | 4                       |                           |                                |
|      | 155           | V                  | A         |           | M         |                       |                         | 2                         | 2                              |
|      | 160           | A                  | V         |           |           | 3.2 (A)               | 2                       | 1                         |                                |
|      | 172           | I                  | V         |           |           |                       | 1                       |                           |                                |
|      | 196           | S                  | F         |           |           |                       |                         | 1                         |                                |
| 197  | S             | L                  |           |           |           |                       | 1                       |                           |                                |
| 199  | D             | G                  |           |           |           |                       | 1                       | 1                         |                                |
| 2B   | 85            | L                  | V         |           |           |                       | 1                       | 1                         |                                |
| 2C   | 59            | D                  | A         |           |           |                       | 1                       |                           |                                |
|      | 136           | D                  | E         |           |           |                       | 1                       | 2                         |                                |
|      | 282           | D                  | H         |           |           |                       | 1                       |                           |                                |
|      | 283           | V                  | M         |           |           | 49.8                  | 1                       | 8                         | 1                              |
|      | 288           | P                  | L         |           |           |                       | 1                       | 1                         |                                |
| 3A   | 94+           | Insertion          | Insertion |           |           |                       | 1                       |                           |                                |
|      | 136           | N                  | D         |           |           | 35.9                  | 6                       | 7                         | 8                              |
|      | 146           | A                  | V         |           |           |                       | 1                       |                           |                                |
|      | 147           | E                  | A         |           |           |                       | 1                       | 1                         |                                |
| 3B   | 3             | Y                  | H         |           |           | 0.6                   | 1                       |                           |                                |
|      | 7             | L                  | R         |           |           |                       | 1                       |                           |                                |
| 3C   | 66            | D                  | D         |           |           | 11.4                  | 1                       |                           | 1                              |
| 3D   | 3             | I                  | V         |           |           |                       | 1                       |                           | 1                              |
|      | 138           | T                  | I         |           |           |                       | 1                       |                           | 2                              |

**Figure 5.** Proportion of inherited polymorphism

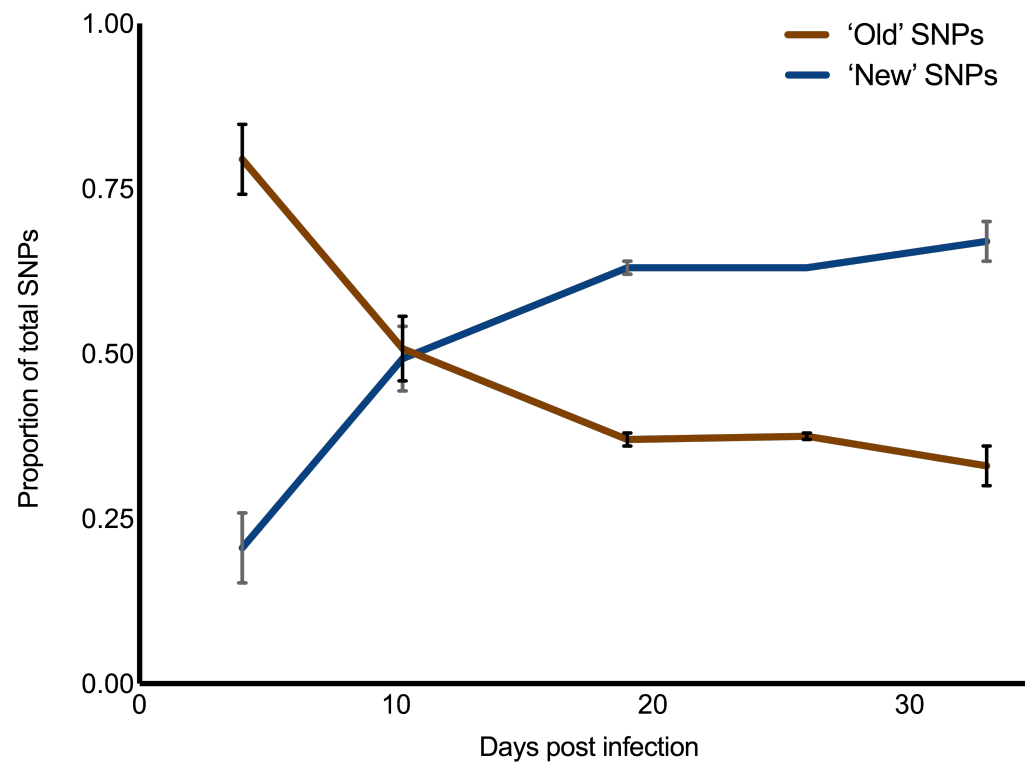



241 *Nonsynonymous substitutions*

242 Genetic variations that resulted in amino acid substitutions in sampled viruses were examined at  
243 the consensus and subconsensus level. Focusing on the regions encoding the capsid proteins  
244 VP2, VP3 and VP1 at the consensus level, 31 sites encoded amino acid changes yet only 3 of  
245 these were polymorphic in the inoculum (Figure 4 and Table S2). Homology modeling  
246 implicated 15 of these sites as putative antigenic targets based on published data [30-36]: VP2-  
247 78, 82, 88, and 131; VP3-70, 131, and 175; VP1-96, 142, 144, 147, 155, 196, 197, and 199  
248 (Figure 6). In order to detect residues with evidence of positive selective pressure, mixed effects  
249 model of evolution (MEME) analysis was run collectively (per host) on FMDV haplotypes  
250 reconstructed from serially-sampled deep sequence [37]. Haplotypes present in each sample were  
251 resolved at relative frequencies  $> 0.5\%$  or  $> 2.0\%$  with ViQuaS [38]. The presence of positively-  
252 selected amino acid changes predicted by MEME ( $P \leq 0.10$ ) are tallied for each host (Figure 4).  
253 The majority of consensus-level nonsynonymous substitutions and those detected in MEME  
254 analysis were detected only transiently (did not become fixed) and none were detected  
255 consistently in either vaccinated or naïve groups.

256

257 The greatest quantity of residues with evidence of positive selective pressure was in VP1,  
258 specifically in the GH loop (Figure 4, Figure 6). The canonical FMDV receptor in cattle is  
259 integrin  $\alpha\beta_6$ , which binds to a conserved RGD motif within the GH loop of VP1 [12, 39]. The  
260 vaccine used in this study was an adenovirus-vectored recombinant which encoded RGD at the  
261 anti-receptor motif. However, the inoculum encoded an SGD motif at this locus (residues 144-  
262 146) with no evidence of an RGD virus  $\geq 0.5\%$  in the population (Table S2). The earliest  
263 detection of RGD at this site was in animal 14-34 at 6 dpi, in which 4.4% of the-virus population

**Figure 6.** Homology model of inoculum consensus sequence with template PDB 4GH4 (FMDV A22). Surface view of FMDV A24 capsid protomer including VP1 (blue), VP2 (green), and VP3 (red). Labeled amino acid sites are those found to be under selective pressure according to MEME analysis as well as amino acids identified to be variable at the consensus level in samples derived from infected cattle. Inset: known antigenic sites in grey and heparan sulfate binding in yellow.

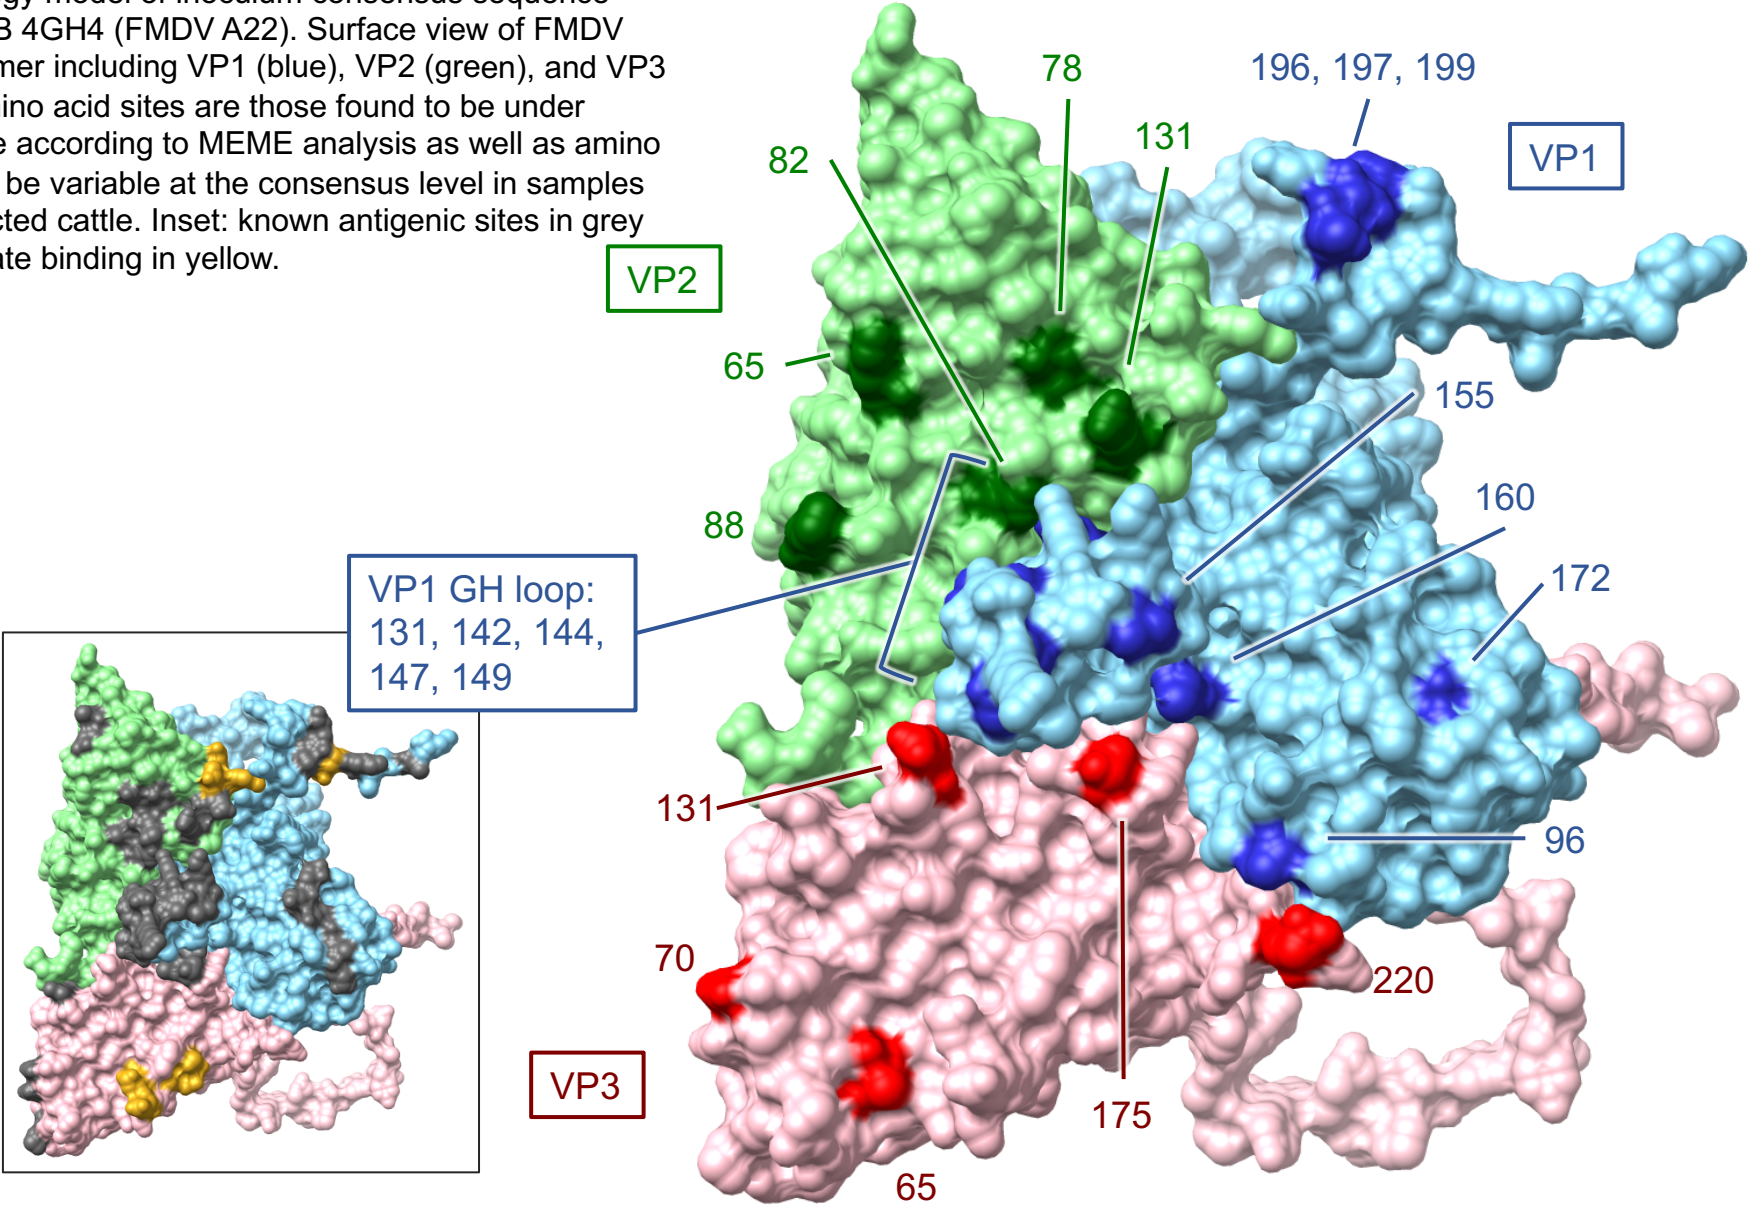

264 had the arginine substitution. The following day, 99.3% of the virus population sampled in this  
265 host encoded RGD at the GH loop. Ultimately, VP1-S144R came to fixation in all cattle sampled  
266 in the persistent phase except for two vaccinated individuals (15-12 and 15-13); this substitution  
267 was also commonly observed in persistent-phase cattle samples in a previous study that used the  
268 same inoculum [40]. The latest initial detection of a dominant RGD genome was in animal 14-  
269 33, in which it emerged between 10 dpi ( $\leq 2\%$ ) and 21 dpi (99.6%). The VP1-S144R substitution  
270 was separately encoded by 2 of the 3 possible S>R codon changes (AGU>CGU and  
271 AGU>AGA) in 5 of the 6 characterized haplotypic backgrounds and one uncategorized genotype  
272 (15-14 at 17 and 28 dpi). There was also evidence of multiple independent RGD subpopulations  
273 co-infecting hosts. The subconsensus variants in animal 14-110 samples at 14 and 17 dpi  
274 included dozens of intermediate-frequency (10-50%) SNPs indicative of many different viruses  
275 alongside a fixed (99.8%) VP1-S144R substitution (Table S1). At the consensus level, a distinct  
276 shift in dominance from one haplogroup (group B) to another (group F) was evident between 17  
277 dpi and 21 dpi, differing by 23 SNPs, (Figure 2).

278 There was strong evidence suggesting that the selection for RGD viruses resulted in global  
279 reductions in population diversity and introduction of novelty through genetic draft (i.e. resultant  
280 selective sweeps). The clearest evidence of this was the dominance of haplogroup C viruses in  
281 animals 14-34 and 14-49, in which a series of changes in the coding region for 2C -  
282 T43M...H84N...D136E...I248T co-emerged with VP1-S144R at corresponding proportions  
283 (Tables S1 and Figure S3). Selective sweeps associated with RGD genome emergences were also  
284 evident in animal 15-14 at 17 dpi (VP3-A75V and VP1-I35V) as well as animal 14-33 at 21 dpi  
285 (VP1-G33S) (Table S1 and Figure S3). In contrast, animals 15-12 and 15-13 maintained SGD  
286 viruses through study end. Interestingly, this was associated with consensus-level changes

287 indicative of antigenic escape. In 15-12, 21 dpi FMDV samples had a qualitatively divergent  
288 VP2-E82K capsid substitution and subsequent 28 and 35 dpi samples had VP2-H88N and VP1-  
289 V155A substitutions. In 15-13, 21 and 28 dpi viruses had VP3-E131K capsid substitution and  
290 were followed at 35 dpi by variants with dominant VP2-E131G and VP3-E131G substitutions.  
291 Each of these amino acid changes involved electrostatic shifts on the capsid surface in known  
292 antigenic regions (Figure 6).

293 In the present study, there were relatively few sites with evidence of adaptation within  
294 nonstructural proteins. The most common replacement in nonstructural regions found across all  
295 animals was 3A-N136D, which was present in 15 of 20 animals. Although this replacement was  
296 relatively common in the inoculum at 35.9%, its presence as fixed or in the final sample  
297 consensus of 5/7 persistently infected animals, suggested an adaptive advantage. MEME analysis  
298 identified several sites under selective pressure in coding region for the C-terminus of 3A, with  
299 3A-N136D identified in more cattle than any other substitution (Figure 4). In contrast, other  
300 commonly variable consensus-level amino acid changes such as 2C-V283M and 3A-S117N, had  
301 no evidence of adaptive value in that there was little or no predilection for fixation.

302

### 303 *Persistent infection & the nasopharynx*

304

305 The hypothesis that viral population diversity correlated with the establishment or maintenance  
306 of persistent FMDV infection was tested. Viruses characterized from terminators (14-108, 14-  
307 111, and 14-57) did not significantly differ from dpi-matched viruses sampled from persistently  
308 infected carriers in substitution rate (4.29 vs. 3.47 subs/day, Figure S2) or global entropy (Figure  
309 1). Entropy was lower in viruses sampled from terminators compared to dpi-matched samples

310 from carriers (Figure 1). This difference was only statistically significant within the nonstructural  
311 protein coding regions, indicating more conservation (purifying selection) in these regions of the  
312 FMDV genomes in terminators than in carriers. While very few consensus-level amino acid  
313 changes were identified in non-carrier viruses, the mutation VP3-Q220R, located at the VP3-  
314 VP1 cleavage site and on the capsid surface, was uniquely identified in samples derived from  
315 these cattle at 10 dpi.

316

317

## 318 **Discussion**

319

320 Although the quasispecies character of RNA viruses have been known for many years,  
321 investigation during infection of natural hosts considering the inter-relationships with hosts'  
322 biological processes have received less attention. In this study, samples collected from FMDV-  
323 vaccinated and non-vaccinated cattle over 5 weeks were analyzed by deep-sequencing in order to  
324 investigate viral population dynamics in a natural host over all phases of infection. Host  
325 vaccination status was associated with significant differences in virus substitution rates, entropy,  
326 and evidence for adaptation. While both vaccinated and non-vaccinated cohorts established and  
327 maintained FMDV infection at similar prevalence [25, 41], deep sequence evaluation of the  
328 sampled viruses clearly demonstrated a narrow population bottleneck during early infection of  
329 vaccinated animals and contrasted the absence of population contraction in the non-vaccinated  
330 hosts. Specifically, measures of global Shannon entropy and rates of consensus-level nucleotide  
331 substitution were consistently lower through the early phase of infection in virus populations  
332 sampled from vaccinated versus non-vaccinated cattle (Table 1, Table S1, Figure S2).

333 Additionally, virus populations in samples from the early phase of infection in non-vaccinated  
334 animals were composed of multiple haplogroups while those in samples from vaccinated cattle  
335 belonged to single lineages. However, detection of endurance of the multiple founding lineages  
336 became increasingly uncommon in non-vaccinated hosts over time and by 21 dpi, nearly all  
337 samples included only single haplogroups. This pattern is consistent with bottlenecks observed in  
338 the transition from acute to chronic stages of infection with hepatitis C virus [42] and human  
339 immunodeficiency virus 1 [43]. Those studies reported that acute infection ended with a  
340 bottleneck of the multiple lineages that had thus far co-existed, leaving only viruses of a single  
341 lineage during chronic infection. In the present study, this decrease in haplogroup heterogeneity  
342 during persistent infection was accompanied by intra-haplotypic diversification as evidenced by  
343 abundant subconsensus polymorphism and sustained entropy measures.

344

345 The early phase of infection in both non-vaccinated and vaccinated hosts are situations in which  
346 virus adaptation is hypothesized to be low [reviewed in 44]. For viruses infecting non-vaccinated  
347 cattle, large population sizes combined with a naïve (non-primed) immune response [24, 41]  
348 creates a context in which fitness differences between variants are minimized, leading to  
349 relatively unconstrained virus propagation. In the current study, these conditions contributed to  
350 relaxed selective pressure which resulted in high virus entropy and maintenance of inherited  
351 variation within virus populations. In vaccinated cattle, a strong primed immune response [24]  
352 provided efficient restriction of most of the variants within the inoculated virus as illustrated by  
353 low entropy and low global variation as compared to non-vaccinates. Importantly, this restriction  
354 eliminated low-frequency mutants with potential adaptive value. Thus, there was no evidence for  
355 viral adaptation in either cohort during the early stages of infection. This is consistent with a



356 previous analysis of FMDV minority variance within serial samples taken from three FMDV-  
357 infected cattle during the acute phase of infection which suggested genetic drift as the primary  
358 mechanism of FMDV evolution both within and between hosts [45]. Of importance to FMDV  
359 epidemiology, these findings suggest that variation detected in field samples from FMDV  
360 outbreaks (acute phase) is most likely the result of stochastic processes e.g. genetic drift and  
361 transmission bottlenecks.

362

363 Nonetheless, virus evolution did take place within the scope of this study, most notably in  
364 genomic regions encoding capsid proteins. The canonical FMDV receptor in cattle is integrin  
365  $\alpha\beta 6$ , which the virus utilizes for host cell entry by binding to a conserved RGD motif within the  
366 GH loop of capsid protein VP1 (residues 144-146) [12, 39]. The inoculum used in the current set  
367 of experiments was known to instead encode an SGD motif at this locus [17] as a result of prior  
368 passages in bovine tongue epithelium (see methods for details). Mutation of the SGD motif to  
369 RGD is fitness-enhancing as it facilitates integrin binding and host cell entry in all cattle.  
370 Specifically, experimental work has demonstrated that VP1-144 serine to arginine substitution  
371 allows for improved cell to cell transmission [46]. In the current study, RGD fixation took place  
372 in every non-vaccinated animal sampled after 10 dpi (5/5) yet in only half of vaccinated animals  
373 through persistent-phase to study end (2/4). This suggests that even though vaccination does not  
374 prevent subclinical or persistent infection, it can provide improved protection from critical viral  
375 adaptations (in this study, SGD->RGD). This represents an important benefit not typically  
376 attributed to vaccines, i.e. impeding the accrual of mutations which might be beneficial to the  
377 virus.

378

379 Experimental works have shown that escape mutations were likely to arise at GH loop residues  
380 near to a conserved RGD motif, including under GH loop-specific monoclonal antibody  
381 neutralization [47-51]. In the current study, MEME analysis identified numerous sites in  
382 antigenic capsid regions suggestive of escape mutations. The majority of the sites identified by  
383 MEME were detected at low subconsensus frequencies and were not shared across animals. This  
384 type of low-frequency variation, independent of vaccination status or phase of infection in this  
385 study, is consistent with mutant swarm character described as central to the concept of FMDV  
386 quasispecies [6, 52].

387

388 In six serially sampled cattle, MEME identified residue 136 in the 3A protein to have evolved  
389 under positive selective pressure. 3A is a membrane-integrated protein that interacts with FMDV  
390 RNA polymerase and, although not fully understood, has been implicated in intracellular  
391 transport [53, 54]. The C-terminus of 3A has been associated with host-specific adaptation of  
392 FMDV. Specific deletions within this region have been associated with clinical attenuation in  
393 cattle [55-57] while virulence in pigs is maintained [58, 59].

394

395 In order to test the hypothesis that FMDV clearance was associated with specific virus  
396 population characteristics, samples from terminators were examined for consistent trends.  
397 Viruses isolated from these hosts during their later stages of infection had reduced global entropy  
398 when compared to both earlier samples from those same animals and comparable carrier viruses.  
399 Specifically, virus sampled from animal 14-108 at 10 dpi encoded a fixed haplotype (group F)  
400 with low entropy and no polymorphism; these population characteristics are consistent with a  
401 swarm that was nearing extinction. Viruses from animal 14-111 also had reduced global entropy



402 without ever acquiring the VP1-144R that was detected in all other viruses isolated from non-  
403 vaccinated cattle, possibly making the virus more vulnerable to clearance despite its two  
404 divergent lineages (groups B and F). A single amino acid replacement shared exclusively by  
405 terminators was VP3 Q220R. While this site has been shown to be prone to variation, including  
406 glutamine and arginine [30, 60], and thus unlikely deleterious, it merits further investigation.  
407 These results suggest that reduced diversity of viral populations may contribute to termination of  
408 infection, consistent with the concept that the mutant spectrum is important to viral fitness [21,  
409 61]. Specific host immunological profiles [41] were not associated with observed viral genomic  
410 changes. Although the transitional phase is the period during which persistence-determining  
411 events are hypothesized to take place [25], the mechanisms responsible for FMDV persistence  
412 were not clearly established herein. Future investigation focused on the FMDV quasispecies and  
413 host factors during the transitional period in terminators may elucidate the critical factors that  
414 determine viral clearance.

415  
416 The particularly rapid mutation rates of RNA viruses can facilitate responses to changing  
417 adaptive host immunity through the selection for escape mutants at antigenic epitopes [62-65].  
418 We hypothesized that as FMDV evolved within each host, the virus would acquire escape  
419 mutations as a result of actuated humoral and cellular immune responses. However, based upon  
420 comparative literature- and homology model-based SNP analysis, there was limited expansion of  
421 antigenic diversity observed in the majority (5/7) of animals that were sampled through the  
422 persistent phase of infection. Each of these five cattle acquired populations with fixed (> 98%)  
423 RGD genomes associated with selective sweeps. Such sweeps include the clearance of ancestral  
424 and novel low-frequency variation as well as genetic draft, both of which were observed in these

425 cattle. Loss of low-frequency variation provides a plausible explanation for the limited detection  
426 of antigenic variation in these cattle while genetic draft may explain the acquisition of irregular  
427 changes (e.g. 2C substitutions in haplogroup C members) that occurred synchronously with RGD  
428 replacement. Although previous studies have demonstrated that continual changes to FMDV  
429 capsids occur over longer time courses of persistent infection [66, 67], this could not be  
430 addressed in the current study.

431

432 Notably, there is some suggestion from the current findings that selective pressure on the virus  
433 may also be reduced during FMDV persistence. Specifically, capsid/CDS entropy did not  
434 significantly differ between phases of infection (in any cohort), nor did subconsensus or  
435 consensus amino acid replacements indicate strong adaptation. This is consistent with previous  
436 findings in Cape buffalo that autologous antibody neutralization of FMDV does not change  
437 throughout persistent infection [29] and other reports demonstrating that the nasopharyngeal  
438 mucosa may function as an immunoprivileged or immunosuppressed site, supported by gene  
439 expression patterns suggesting a down-regulated anti-viral response [68, 69]. This privileged  
440 state may in effect relax selective pressure, thus further limiting persistent virus escape  
441 adaptation. A goal of our ongoing research is to integrate sub-anatomic host tissue features and  
442 signaling patterns with FMDV subconsensus variation.

443

444 In contrast to the SGD-RGD transformation which occurred in most animals, viruses isolated  
445 from vaccinated animals 15-12 and 15-13 never acquired the RGD motif nor were these  
446 populations affected by associated selective sweeps. Viruses in these two hosts were thus more  
447 capable of acquiring predicted escape substitutions featuring substantial electrostatic changes

448 within the time frame of the study. Specifically, persistent phase viruses included replacements  
449 at VP2-82 and -88, VP3-131 and VP1-155. An alternative hypothesis for capsid mutation  
450 particular to SGD viruses is adaptation to an alternative host cell receptor, such as heparan  
451 sulfate [70]. However, evaluation of amino acid changes in capsid structural models did not  
452 support any of these lying in the heparan sulfate binding site (Figure 6 inset) [31]; nonetheless,  
453 efficiency to bind other integrins or alternate receptors may be involved [46, 71]. The extent to  
454 which the recombinant RGD vaccine prevented emergence of the RGD motif in 2 vaccinated  
455 animals could not be verified within the current study design.

456  
457 Persistent FMDV infection in cattle is restricted to distinct epithelial foci within the  
458 nasopharyngeal mucosa [23, 25, 72]. If these foci represent distinct viral subpopulations, this  
459 should be reflected in the deep sequence of oropharyngeal fluid samples which are retrieved with  
460 a probang cup, which harvests cells from multiple regions of the pharynx epithelium. Each OPF  
461 sample included at least 2 subpopulations in all hosts. These subpopulations may represent sub-  
462 anatomic vicariance at distinct epithelial foci, i.e. viruses infect cells and replicate in isolated  
463 groups, leading to genomically identifiable subgroups. Coexistent persistent-phase FMDVs  
464 belonging to different lineages has previously been reported for cattle [73, 74]. Genomic RNA  
465 and in some cases, infectious virus, belonging to multiple FMDV serotypes have been detected  
466 in subclinically infected Cape buffalo (*Syncerus caffer*) and water buffalo (*Bubalus bubalis*) [28,  
467 75, 76]. Coexistent viruses are a prerequisite for recombination, which has been demonstrated to  
468 play a role in the evolution of FMDV [28, 77, 78]. The divergence among the viruses sampled  
469 herein was inadequate for recombination detection. Nonetheless, inability to determine

470 haplogroups in late-stage samples from hosts 15-14 and 14-33 was due to ambiguity of clade-  
471 informative SNPs, which may be a result of recombination.

472

473 These findings have important implications for the inter-relationship between FMDV within-host  
474 evolution and transmission. In both vaccinated and non-vaccinated hosts, variation detected  
475 during the first few days of infection appears not to be driven by selective (immunological)  
476 pressures. Novel mutations, while highly-adaptive, took at least one week to reach consensus  
477 level. Because most transmission of FMDV is believed to occur within the first few days of  
478 infection [79, 80], these novel mutations would have a narrow chance of being passed on within  
479 this window of transmission. If this course of evolution is typical throughout chains of  
480 transmission, it follows that nearly all FMDV genomic change observed in field isolates is the  
481 result of purifying and neutral evolution, as has been suggested for the virus [45, 74, 81, 82]. For  
482 those low-frequency adaptive SNPs that are successfully transmitted, neutral or weak-purifying  
483 selection within this window would not favor them through extended chains of transmission.

484

485

#### 486 *Summary and Conclusion*

487

488 Subconsensus variation in FMDV populations were investigated in vaccinated and naïve cattle  
489 for 35 days following simulated natural infections. FMDV genomic change detected during early  
490 infection was consistent with neutral evolution all cattle. A critical capsid adaptation at the site of  
491 host cell entry, VP1 S144R, came to fixation in most animals and was associated with selective  
492 sweeps; putative antigenic escape mutations only arose in vaccinated animals within the time  
493 frame of the study. Furthermore, during early infection, vaccination caused virus population

494 bottlenecks which did not occur in the naïve cattle. This differential quasispecies behavior in  
495 vaccinated hosts may provide insights into further enhancement of countermeasures to impede  
496 viral propagation at the individual animal level. Additionally, multiple subpopulations were  
497 present in viruses recovered during the persistent phase, consistent with distinct foci of FMDV  
498 infection in nasopharyngeal epithelial cells, furthering our understanding of the nature of  
499 persistent infection. These findings contribute novel insights to the evolution of FMDV in natural  
500 host species.

501

## 502 **Methods**

503

### 504 *Animal studies*

505 The animal experiments were part of a multi-study analysis of the FMDV carrier state described  
506 in previous publications [24, 25, 41]. All studies were carried out at Plum Island Animal Disease  
507 Center, New York under BSL-3Ag conditions and with approval from the Plum Island Animal  
508 Disease Center Institutional Animal Care and Use Committee (protocol 209-13). Briefly, a group  
509 of steers were vaccinated with a recombinant adenovirus-vectored FMDV A vaccine 2-weeks  
510 prior to intra-nasopharygeal inoculation with FMDV A24 Cruzeiro. In parallel, a group of non-  
511 vaccinated animals were inoculated with the same FMDV A24 Cruzeiro inoculum. Animals  
512 were sacrificed at predetermined time points, up to 35 days post inoculation and tissues were  
513 harvested for analysis.

514 Three distinct phases, namely, the early, transitional and persistent phases, define FMDV  
515 infection in livestock [25, 83]. The phases vary between animals of different immune statuses i.e.  
516 vaccinated or non-vaccinated animals. Non-vaccinated cattle undergo clinical and systemic

517 disease in the early (acute) period lasting approximately 1-9 dpi while vaccinated cattle remain  
518 subclinically infected yet shedding virus between 1-7 dpi [84]. The transitional phase is  
519 associated with a reduction of clinical signs (if present) and either completely clearing of  
520 infection or ‘transitioning’ from early to persistent infection. The transitional phase in vaccinated  
521 and non-vaccinated animals occurs approximately between 7-14 dpi and 10-21 dpi, respectively.  
522 Entry into the persistent phase of infection is associated with subclinical FMDV replication in  
523 the nasopharyngeal mucosa if the infection was not cleared in the transitional phase.  
524 Antemortem samples collected from these animals included oral swabs, nasal swabs, serum, and  
525 oropharyngeal fluid (OPF) harvested using a probang cup [83]. Postmortem vesicular lesions  
526 (Ves) or nasopharyngeal mucosa (Np) were collected at necropsy. Host factors including  
527 immunoglobulin and transcriptomic data were analyzed in prior publications [24, 25, 41]. The  
528 inoculum and a total of 103 samples from 20 animals were included in the present analysis; 77  
529 samples originated from 10 non-vaccinated animals and 26 from 10 vaccinated animals.

530

### 531 *Inoculum*

532 The FMDV A24 Cruzeiro (GenBank # SRP149342) inoculum was derived from a field strain  
533 passaged once in BHK-21 cells and twice in cattle as previously described [17]. The first bovine  
534 passage consisted of harvested vesicular epithelium and vesicular fluid obtained at 48 hours post  
535 tongue inoculation of two animals. The filtered suspension generated from the harvested material  
536 was subsequently used to inoculate a second cohort of three cattle. Vesicular fluid and  
537 epithelium were again harvested at 48 hours post inoculation and processed (macerated and  
538 filtered) to generate the virus suspension that was used to infect all animals in the present work.  
539 The inoculum was aliquoted and stored at -70°C until use, at which time  $10^5$  BTID<sub>50</sub> (50%

540 infectious does titrated in bovine tongue epithelium) [27] was used for inoculation in the current  
541 study.

542

### 543 *Sequencing*

544 Illumina-derived deep sequence was examined for 75 of the total 103 virus samples (NCBI  
545 PRJNA473786). The consensus sequences of 52 of these samples were previously published,  
546 (GenBank MH426523-74) [17]. Nine samples were not passaged, noted as ‘raw’ in Figure S1  
547 and Figure S3, and 94 samples were passaged once in LFBK-  $\alpha\beta 6$  cells [85]. Viral RNA was  
548 extracted using the MagMAX RNA Isolation Kit (Thermo Fisher Scientific), reverse-transcribed  
549 and amplified, generating three overlapping amplicons covering the full CDS. Sequencing  
550 libraries were prepared with the Nextera XT DNA Library Prep Kit (Illumina, USA) and  
551 sequenced on the Illumina NextSeq 500 platform. All reads were quality-filtered, primer-  
552 trimmed and mapped to the inoculum consensus sequence in CLC Genomics Workbench v. 10  
553 ([www.qiagenbioinformatics.com](http://www.qiagenbioinformatics.com)). Read coverage of samples for which deep sequence was  
554 included in this study ranged from 338 – 155,000 (mean 30,000) averaged across the CDS. The  
555 inoculum deep sequence run totaled 10.4 million reads with a minimum coverage of 72,700  
556 across the CDS.

557

### 558 *Consensus-level sequence analysis*

559 Alignments, pairwise distances and the maximum likelihood phylogeny (PhyML 3.2 [86]) were  
560 evaluated in MEGA 7.0 [87] and Geneious 7.1 ([www.geneious.com](http://www.geneious.com) [88]). Substitution rates  
561 were calculated by tabulating pairwise nucleotide differences between each consensus sequence  
562 and the preceding sample sequence as a function of elapsed time between the two sample

563 acquisitions. In cases for which there were multiple samples from the same animal on the same  
564 date (differing only by sample type or passage history), values were averaged. Statistical  
565 significance of differences between rates was calculated via T-test and Rank-sum, with the  
566 higher value of the two used as P in associated text, figures and tables.

567

#### 568 *Subconsensus sequence analysis*

569 The Low Frequency Variant Detection tool in CLC Genomics Workbench was utilized to  
570 determine variant sites present within each deep-sequenced sample present in > 2% of mapped  
571 reads with a minimum coverage of 20 reads and .75 strand-bias filter. For the inoculum, variants  
572 present  $\geq 0.5\%$  were determined. Consensus-level sample substitutions that matched SNVs  
573 present at  $\geq 0.5\%$  in the inoculum deep sequence were categorized as ancestral SNPs, having  
574 most likely been present in an ancestral genome (i.e. transmitted in the inoculum gene pool). The  
575 remaining substitutions, those not detected in the inoculum  $\geq 0.5\%$ , were classified as novel  
576 SNPs, more likely to have resulted from within-host *de novo* mutation. Shannon entropy was  
577 calculated from quality-filtered and primer-trimmed reads in natural log units with a custom  
578 script.

579

#### 580 *Test of diversifying selection*

581 Sites with evidence of having evolved under positive selective pressure in FMDV populations  
582 within hosts over time were determined with mixed effects model of evolution (MEME) analysis  
583 in the HyPhy package [89]. MEME analysis of each individual host identified sites encoding  
584 amino acid changes that significantly deviate from those that occur under neutral models of  
585 evolution; positively selected sites of statistical significance ( $P \leq 0.10$ ) are included in Figure 4.



586 In order to incorporate subconsensus variation and linkage between low-frequency variants in  
587 MEME, haplotypes were reconstructed with the ViQuaS pipeline [38] with *SSAKE* [90]  
588 parameters  $o = 5$ ,  $r = 0.75$ . This pipeline reconstructs the haplotypic composition present within  
589 each sample present either  $> 0.5\%$  for cattle 14-33, 14-49, 14-108, 14-111, 15-12, 15-13, and 15-  
590 14 or  $> 2\%$  for cattle 14-34 and 14-110 thresholds from quality-filtered, primer-trimmed deep  
591 sequence reads.

592

### 593 *Haplotypic composition of sample populations*

594 In order to characterize FMDV lineages that made up each sample population, haplogroup-  
595 specific SNPs were first inferred from consensus sequence-derived phylogenetic relationships.  
596 The presence of these characteristic (haplotypic) SNPs dictated the subpopulation in which the  
597 sample was classified (Figure 3). Idealized criteria for these SNPs: i) shared with all members of  
598 a lineage, ii) present in identical consensus sequenced derived from different animals, iii)  
599 detected at proportionate frequencies at the subconsensus level and iv) present in at least one  
600 homogeneous sample. For most samples, the dominant (majority) virus was identified by the  
601 sample consensus and location in the phylogeny. This approach is exemplified with sample 14-  
602 34\_6\_dpi (Table S1ex.), where haplogroup F characteristic SNPs (orange) are represented by  
603 approximately 79% of reads, group A (blue) includes SNPs ranging from 14.5 – 20.3% and  
604 group C (green) by ~4.5% of reads. Relative haplotype frequencies within each sample were  
605 established using the lowest SNP frequency among each haplotype's characteristic SNPs. These  
606 frequencies were used to construct proportional stacked bar graphs (Figure 3); samples lacking  
607 deep sequence data had 49% of the population designated undetermined.

608

609 *Protein structure*

610 The inoculum capsid protomer homology modeling was executed in SWISS-MODEL  
611 ([swissmodel.expasy.org](http://swissmodel.expasy.org)) with an FMDV A22 (PDB 4GH4) template. UCSF Chimera 1.13  
612 ([www.cgl.ucsf.edu/chimera](http://www.cgl.ucsf.edu/chimera) [91]) was used for annotation and imaging. Annotation of antigenic  
613 regions and heparan sulfate binding site are based upon published works [31, 34-36].

614

615 *Data availability*

616 All new sequence data have been made available as sequence read archive (SRA) files at the  
617 National Center for Biotechnology Information (NCBI) under SAMN10280742-861. Previously  
618 published sequence data included in the present work is also available at NCBI, GenBank  
619 MH426523-74.

620

621 *Acknowledgements*

622 This research was funded in part by United States Department of Agriculture (USDA) ARS-  
623 CRIS Project 1940-32000-061-00D. IF is the recipient of a Plum Island Animal Disease Center  
624 Research Participation Program fellowship, administered by the Oak Ridge Institute for Science  
625 and Education (ORISE) through an interagency agreement between the United States  
626 Department of Energy (DOE) and the USDA. All opinions expressed in this paper are the  
627 authors' and do not necessarily reflect the policies and views of the USDA, DOE, or ORISE. The  
628 authors would like to thank GR Smoliga and EJ Hartwig for support with sample processing, G  
629 Belsham for manuscript review and valuable insights, WM Fischer for his Shannon entropy  
630 script, and D Rai, E Rieder, T Goldberg, BP Brito and LL Rodriguez for insightful discussions  
631 and suggestions towards the foundations of this project.

632

633 Figure / Table Captions:

634

635 Table 1. <sup>a</sup> =  $P < 0.05$ ; <sup>b</sup> =  $P < 0.001$ ; subs/st/yr: substitutions / site / year. CDS: coding region.

636

637 Figure 1. Average Shannon entropy in sample FMDV coding regions. DPI: days post infection,

638 CDS: coding sequence, nonstruc.: nonstructural protein coding regions (including VP4), capsid:

639 VP1, VP2, and VP3 coding regions. Heat coloring indicates relative values with red denoting

640 higher and blue denoting lower. \*Non-vaccinated only, dpi-matched (5-14 dpi) samples

641 averaged for non-carriers and carriers. Animals with undetermined carrier status (14-49, 14-50

642 and 14-51) were euthanized at 10 dpi or earlier.

643

644 Figure 2. Inoculum-rooted maximum likelihood phylogeny of sample consensus sequences

645 determined using PhyML [86]. Non-vaccinated cattle IDs are black text and vaccinated are light

646 blue. Haplotypic clades (A-F) are colored according to inferred ancestral relationships and

647 correlated polymorphism frequencies (see ‘haplotypic composition of sample populations’ in

648 methods).

649

650 Figure 3. Haplogroup proportions in virus samples from 9 serially-sampled cattle and colored as

651 in Figure 2. Proportions were determined based on SNP profiles characteristic of each lineage.

652 Gray indicates lineage unidentified. X axis is days post infection at which sample was taken;

653 ‘hpi’ is hours post infection, between 4 and 21 hpi.

654

655 Figure 4. Variable FMDV capsid amino acids and positively-selected sites combined. <sup>a</sup> Presence  
656 of positively-selected sites identified in individual serially-sampled cattle using mixed effects  
657 model of evolution (MEME) analysis ( $P \leq 0.10$ ) (Murrell et al. 2012). <sup>b</sup> Amino acids identified as  
658 variable between viruses at the consensus level in VP1, VP2, and VP3 capsid coding regions.

659

660 Figure 5. Proportion of inherited polymorphism. Substitutions present at the consensus level  
661 across samples also present at the subconsensus level in the inoculum ( $\geq 0.5\%$ ) are defined as  
662 ancestral SNPs. The remaining nucleotide changes observed in sample consensuses (not detected  
663 in the inoculum) are defined as novel.

664

665 Figure 6. Homology model of inoculum consensus sequence with template PDB 4GH4 (FMDV  
666 A22). Surface view of FMDV A24 capsid protomer including VP1 (blue), VP2 (green), and VP3  
667 (red). Labeled amino acid sites are those found to be under selective pressure according to  
668 MEME analysis as well as amino acids identified to be variable at the consensus level in samples  
669 derived from infected cattle. Inset: known antigenic sites in grey and heparan sulfate binding in  
670 yellow.

671

672 Supplemental Figures and Tables

673 Figure S1. Experimental design: sequenced sample sources and times.

674 Figure S2. Pairwise differences: Vaccinated vs. Naïve, Carriers vs. Terminators.

675 Table S1. Table of all variant nucleotides  $\geq 2\%$  in deep-sequenced samples.

676 Table S2. Table of all variant nucleotides  $\geq 0.5\%$  in inoculum.

677 Figure S3. Amino acid alignment of all sample consensus sequences.

678

- 679 1. Alexandersen, S., et al., *The pathogenesis and diagnosis of foot-and-mouth disease*. J  
680 Comp Pathol, 2003. **129**(1): p. 1-36.
- 681 2. Arzt, J., et al., *The pathogenesis of foot-and-mouth disease II: viral pathways in swine,*  
682 *small ruminants, and wildlife; myotropism, chronic syndromes, and molecular virus-host*  
683 *interactions*. Transbound Emerg Dis, 2011. **58**(4): p. 305-26.
- 684 3. Knight-Jones, T.J. and J. Rushton, *The economic impacts of foot and mouth disease -*  
685 *what are they, how big are they and where do they occur?* Prev Vet Med, 2013. **112**(3-  
686 4): p. 161-73.
- 687 4. Brito, B.P., et al., *Review of the Global Distribution of Foot-and-Mouth Disease Virus*  
688 *from 2007 to 2014*. Transbound Emerg Dis, 2015.
- 689 5. Grubman, M.J. and B. Baxt, *Foot-and-mouth disease*. Clin Microbiol Rev, 2004. **17**(2): p.  
690 465-93.
- 691 6. Domingo, E., et al., *Evolution of foot-and-mouth disease virus*. Virus Res., 2003. **91**(1): p.  
692 47-63.
- 693 7. Belsham, G.J., *Influence of the Leader protein coding region of foot-and-mouth disease*  
694 *virus on virus replication*. J Gen Virol, 2013. **94**(Pt 7): p. 1486-95.
- 695 8. Mittal, M., et al., *Phylogeny, genome evolution, and antigenic variability among endemic*  
696 *foot-and-mouth disease virus type A isolates from India*. Arch Virol, 2005. **150**(5): p. 911-  
697 28.
- 698 9. Carrillo, C., et al., *Genetic and phenotypic variation of foot-and-mouth disease virus*  
699 *during serial passages in a natural host*. J Virol, 2007. **81**(20): p. 11341-51.
- 700 10. Tully, D.C. and M.A. Fares, *The tale of a modern animal plague: tracing the evolutionary*  
701 *history and determining the time-scale for foot and mouth disease virus*. Virology, 2008.  
702 **382**(2): p. 250-6.
- 703 11. Strohmaier, K., R. Franze, and K.H. Adam, *Location and characterization of the antigenic*  
704 *portion of the FMDV immunizing protein*. J Gen Virol, 1982. **59**(Pt 2): p. 295-306.
- 705 12. Logan, D., et al., *Structure of a major immunogenic site on foot-and-mouth disease virus*.  
706 Nature, 1993. **362**(6420): p. 566-8.
- 707 13. Wang, G., et al., *How foot-and-mouth disease virus receptor mediates foot-and-mouth*  
708 *disease virus infection*. Virol J, 2015. **12**: p. 9.
- 709 14. Acevedo, A., L. Brodsky, and R. Andino, *Mutational and fitness landscapes of an RNA*  
710 *virus revealed through population sequencing*. Nature, 2014. **505**(7485): p. 686-90.
- 711 15. Borderia, A.V., et al., *Group Selection and Contribution of Minority Variants during Virus*  
712 *Adaptation Determines Virus Fitness and Phenotype*. PLoS Pathog, 2015. **11**(5): p.  
713 e1004838.
- 714 16. Wei, H., et al., *Deep-sequencing of Marburg virus genome during sequential mouse*  
715 *passaging and cell-culture adaptation reveals extensive changes over time*. Sci Rep,  
716 2017. **7**(1): p. 3390.
- 717 17. Arzt, J., et al., *The evolution of a super-swarm of foot-and-mouth disease virus in cattle*.  
718 PLoS One, 2019. **14**(4): p. e0210847.
- 719 18. Domingo, E., et al., *Evolution of foot-and-mouth disease virus*. Virus Res, 2003. **91**(1): p.  
720 47-63.

- 721 19. Zeng, J., et al., *Ribavirin-resistant variants of foot-and-mouth disease virus: the effect of*  
722 *restricted quasispecies diversity on viral virulence*. J Virol, 2014. **88**(8): p. 4008-20.
- 723 20. Rai, D.K., et al., *Attenuation of Foot-and-Mouth Disease Virus by Engineered Viral*  
724 *Polymerase Fidelity*. Journal of Virology, 2017. **91**(15).
- 725 21. Domingo, E., J. Sheldon, and C. Perales, *Viral quasispecies evolution*. Microbiol Mol Biol  
726 Rev, 2012. **76**(2): p. 159-216.
- 727 22. Arzt, J., J.M. Pacheco, and L.L. Rodriguez, *The early pathogenesis of foot-and-mouth*  
728 *disease in cattle after aerosol inoculation. Identification of the nasopharynx as the*  
729 *primary site of infection*. Vet Pathol, 2010. **47**(6): p. 1048-63.
- 730 23. Pacheco, J.M., et al., *Persistent Foot-and-Mouth Disease Virus Infection in the*  
731 *Nasopharynx of Cattle; Tissue-Specific Distribution and Local Cytokine Expression*. PLoS  
732 One, 2015. **10**(5): p. e0125698.
- 733 24. Stenfeldt, C., et al., *Pathogenesis of Primary Foot-and-Mouth Disease Virus Infection in*  
734 *the Nasopharynx of Vaccinated and Non-Vaccinated Cattle*. PLoS One, 2015. **10**(11): p.  
735 e0143666.
- 736 25. Stenfeldt, C., et al., *The Foot-and-Mouth Disease Carrier State Divergence in Cattle*. J  
737 Virol, 2016. **90**(14): p. 6344-64.
- 738 26. Arzt, J., et al., *The pathogenesis of foot-and-mouth disease I: viral pathways in cattle*.  
739 Transbound Emerg Dis, 2011. **58**(4): p. 291-304.
- 740 27. OIE. *Terrestrial Animal Health Code, Chapter 8.8 (Infection with foot and mouth*  
741 *disease virus)*. 2016 [cited 2016 July 14, 2016]; Available from:  
742 [http://www.oie.int/fileadmin/Home/eng/Health\\_standards/tahc/current/chapitre\\_fmd.](http://www.oie.int/fileadmin/Home/eng/Health_standards/tahc/current/chapitre_fmd.pdf)  
743 [pdf](http://www.oie.int/fileadmin/Home/eng/Health_standards/tahc/current/chapitre_fmd.pdf).
- 744 28. Ferretti, L., et al., *Within-Host Recombination in the Foot-and-Mouth Disease Virus*  
745 *Genome*. Viruses, 2018. **10**(5).
- 746 29. Cortey, M., et al., *Persistent infection of African buffalo (Syncerus caffer) with Foot-and-*  
747 *Mouth Disease Virus: limited viral evolution and no evidence of antibody neutralization*  
748 *escape*. J Virol, 2019.
- 749 30. Mateu, M.G., et al., *Antigenic heterogeneity of a foot-and-mouth disease virus serotype*  
750 *in the field is mediated by very limited sequence variation at several antigenic sites*. J  
751 Virol, 1994. **68**(3): p. 1407-17.
- 752 31. Fry, E.E., et al., *The structure and function of a foot-and-mouth disease virus-*  
753 *oligosaccharide receptor complex*. Embo J, 1999. **18**(3): p. 543-54.
- 754 32. Perez Filgueira, M., et al., *Detection and characterization of functional T-cell epitopes on*  
755 *the structural proteins VP2, VP3, and VP4 of foot and mouth disease virus O1 campos [In*  
756 *Process Citation]*. Virology, 2000. **271**(2): p. 234-9.
- 757 33. Alam, S.M., et al., *Antigenic heterogeneity of capsid protein VP1 in foot-and-mouth*  
758 *disease virus (FMDV) serotype Asia 1*. Adv Appl Bioinform Chem, 2013. **6**: p. 37-46.
- 759 34. Fry, E.E., et al., *Structure of Foot-and-mouth disease virus serotype A10 61 alone and*  
760 *complexed with oligosaccharide receptor: receptor conservation in the face of antigenic*  
761 *variation*. J Gen Virol, 2005. **86**(Pt 7): p. 1909-20.
- 762 35. Kitson, J.D., D. McCahon, and G.J. Belsham, *Sequence analysis of monoclonal antibody*  
763 *resistant mutants of type O foot and mouth disease virus: evidence for the involvement*



- 764 *of the three surface exposed capsid proteins in four antigenic sites. Virology*, 1990.  
765 **179**(1): p. 26-34.
- 766 36. Thomas, A.A., et al., *Antigenic sites on foot-and-mouth disease virus type A10. J Virol*,  
767 1988. **62**(8): p. 2782-9.
- 768 37. Murrell, B., et al., *Detecting individual sites subject to episodic diversifying selection.*  
769 *PLoS Genet*, 2012. **8**(7): p. e1002764.
- 770 38. Jayasundara, D., et al., *ViQuaS: an improved reconstruction pipeline for viral quasispecies*  
771 *spectra generated by next-generation sequencing. Bioinformatics*, 2015. **31**(6): p. 886-  
772 96.
- 773 39. Kotecha, A., et al., *Rules of engagement between alphavbeta6 integrin and foot-and-*  
774 *mouth disease virus. Nat Commun*, 2017. **8**: p. 15408.
- 775 40. Arzt, J., et al., *Transmission of Foot-and-Mouth Disease from Persistently Infected Carrier*  
776 *Cattle to Naive Cattle via Transfer of Oropharyngeal Fluid. mSphere*, 2018. **3**(5).
- 777 41. Eschbaumer, M., et al., *Systemic immune response and virus persistence after foot-and-*  
778 *mouth disease virus infection of naive cattle and cattle vaccinated with a homologous*  
779 *adenovirus-vectored vaccine. BMC Vet Res*, 2016. **12**: p. 205.
- 780 42. Bull, R.A., et al., *Sequential bottlenecks drive viral evolution in early acute hepatitis C*  
781 *virus infection. PLoS Pathog*, 2011. **7**(9): p. e1002243.
- 782 43. Kijak, G.H., et al., *Rare HIV-1 transmitted/founder lineages identified by deep viral*  
783 *sequencing contribute to rapid shifts in dominant quasispecies during acute and early*  
784 *infection. PLoS Pathog*, 2017. **13**(7): p. e1006510.
- 785 44. Grenfell, B.T., et al., *Unifying the epidemiological and evolutionary dynamics of*  
786 *pathogens. Science*, 2004. **303**(5656): p. 327-32.
- 787 45. Morelli, M.J., et al., *Evolution of foot-and-mouth disease virus intra-sample sequence*  
788 *diversity during serial transmission in bovine hosts. Vet Res*, 2013. **44**: p. 12.
- 789 46. Rieder, E., et al., *Analysis of a Foot-and-Mouth Disease Virus Type A24 Isolate Containing*  
790 *an SGD Receptor Recognition Site In Vitro and Its Pathogenesis in Cattle. J. Virol.*, 2005.  
791 **79**(20): p. 12989-12998.
- 792 47. Mateu, M.G., et al., *Implications of a quasispecies genome structure: effect of frequent,*  
793 *naturally occurring amino acid substitutions on the antigenicity of foot-and-mouth*  
794 *disease virus. Proc Natl Acad Sci U S A*, 1989. **86**(15): p. 5883-7.
- 795 48. Carrillo, C., et al., *Comparison of vaccine strains and the virus causing the 1986 foot-and-*  
796 *mouth disease outbreak in Spain: epizootiological analysis. Virus Res*, 1990. **15**(1): p. 45-  
797 55.
- 798 49. Martinez, M.A., et al., *Evolution subverting essentiality: dispensability of the cell*  
799 *attachment Arg-Gly-Asp motif in multiply passaged foot-and-mouth disease virus. Proc*  
800 *Natl Acad Sci U S A*, 1997. **94**(13): p. 6798-802.
- 801 50. Baranowski, E., et al., *Cell recognition by foot-and-mouth disease virus that lacks the*  
802 *RGD integrin-binding motif: flexibility in aphthovirus receptor usage. J Virol*, 2000. **74**(4):  
803 p. 1641-7.
- 804 51. Perales, C., et al., *Monitoring sequence space as a test for the target of selection in*  
805 *viruses. J Mol Biol*, 2005. **345**(3): p. 451-9.
- 806 52. Ruiz-Jarabo, C.M., et al., *Memory in viral quasispecies. J Virol*, 2000. **74**(8): p. 3543-7.

- 807 53. Gladue, D.P., et al., *Interaction of foot-and-mouth disease virus nonstructural protein 3A*  
808 *with host protein DCTN3 is important for viral virulence in cattle*. J Virol, 2014. **88**(5): p.  
809 2737-47.
- 810 54. Gonzalez-Magaldi, M., et al., *Membrane topology and cellular dynamics of foot-and-*  
811 *mouth disease virus 3A protein*. PLoS One, 2014. **9**(9): p. e106685.
- 812 55. Stenfeldt, C., et al., *A partial deletion within foot-and-mouth disease virus non-structural*  
813 *protein 3A causes clinical attenuation in cattle but does not prevent subclinical infection*.  
814 Virology, 2018. **516**: p. 115-126.
- 815 56. Pacheco, J.M., et al., *A partial deletion in non-structural protein 3A can attenuate foot-*  
816 *and-mouth disease virus in cattle*. Virology, 2013. **446**(1-2): p. 260-7.
- 817 57. Nunez, J.I., et al., *A single amino acid substitution in nonstructural protein 3A can*  
818 *mediate adaptation of foot-and-mouth disease virus to the guinea pig*. J Virol, 2001.  
819 **75**(8): p. 3977-83.
- 820 58. Beard, C.W. and P.W. Mason, *Genetic determinants of altered virulence of Taiwanese*  
821 *foot-and-mouth disease virus*. J Virol, 2000. **74**(2): p. 987-91.
- 822 59. Pacheco, J.M., et al., *Role of Nonstructural Proteins 3A and 3B in Host Range and*  
823 *Pathogenicity of Foot-and-Mouth Disease Virus*. Journal of Virology, 2003. **77**(24): p.  
824 13017-13027.
- 825 60. Carrillo, C., et al., *Comparative genomics of foot-and-mouth disease virus*. J Virol, 2005.  
826 **79**(10): p. 6487-504.
- 827 61. Lauring, A.S. and R. Andino, *Quasispecies theory and the behavior of RNA viruses*. PLoS  
828 Pathog, 2010. **6**(7): p. e1001005.
- 829 62. Pawlotsky, J.M., *Hepatitis C virus population dynamics during infection*. Quasispecies:  
830 Concept and Implications for Virology, 2006. **299**: p. 261-284.
- 831 63. Gebauer, F., et al., *Rapid selection of genetic and antigenic variants of foot-and-mouth*  
832 *disease virus during persistence in cattle*. J Virol, 1988. **62**(6): p. 2041-9.
- 833 64. Ciurea, A., et al., *Viral persistence in vivo through selection of neutralizing antibody-*  
834 *escape variants*. Proceedings of the National Academy of Sciences, 2000. **97**(6): p. 2749-  
835 2754.
- 836 65. Fischer, W., et al., *Transmission of single HIV-1 genomes and dynamics of early immune*  
837 *escape revealed by ultra-deep sequencing*. PLoS One, 2010. **5**(8): p. e12303.
- 838 66. Bertram, M.R., et al., *Lack of Transmission of Foot-and-Mouth Disease Virus From*  
839 *Persistently Infected Cattle to Naive Cattle Under Field Conditions in Vietnam*. Front Vet  
840 Sci, 2018. **5**: p. 174.
- 841 67. Biswal, J.K., et al., *Genetic and antigenic variation of foot-and-mouth disease virus*  
842 *during persistent infection in naturally infected cattle and Asian buffalo in India*. PLoS  
843 One, 2019. **14**(6): p. e0214832.
- 844 68. Eschbaumer, M., et al., *Transcriptomic Analysis of Persistent Infection with Foot-and-*  
845 *Mouth Disease Virus in Cattle Suggests Impairment of Apoptosis and Cell-Mediated*  
846 *Immunity in the Nasopharynx*. PLoS One, 2016. **11**(9): p. e0162750.
- 847 69. Stenfeldt, C., et al., *Clearance of a persistent picornavirus infection is associated with*  
848 *enhanced pro-apoptotic and cellular immune responses*. Sci Rep, 2017. **7**(1): p. 17800.
- 849 70. Jackson, T., et al., *Efficient infection of cells in culture by type O foot-and-mouth disease*  
850 *virus requires binding to cell surface heparan sulfate*. J Virol, 1996. **70**(8): p. 5282-7.



- 851 71. Lawrence, P., et al., *Role of Jumonji C-domain containing protein 6 (JMJD6) in infectivity*  
852 *of foot-and-mouth disease virus*. *Virology*, 2016. **492**: p. 38-52.
- 853 72. Stenfeldt, C., et al., *Contact Challenge of Cattle with Foot-and-Mouth Disease Virus*  
854 *Validates the Role of the Nasopharyngeal Epithelium as the Site of Primary and*  
855 *Persistent Infection*. *mSphere*, 2018. **3**(6).
- 856 73. Juleff, N., et al., *Accumulation of nucleotide substitutions occurring during experimental*  
857 *transmission of foot-and-mouth disease virus*. *J Gen Virol*, 2013. **94**(Pt 1): p. 108-19.
- 858 74. King, D.J., et al., *Investigating intra-host and intra-herd sequence diversity of foot-and-*  
859 *mouth disease virus*. *Infect Genet Evol*, 2016. **44**: p. 286-92.
- 860 75. Maree, F., et al., *Differential Persistence of Foot-and-Mouth Disease Virus in African*  
861 *Buffalo Is Related to Virus Virulence*. *J Virol*, 2016. **90**(10): p. 5132-40.
- 862 76. Farooq, U., et al., *Characterization of naturally occurring, new and persistent subclinical*  
863 *foot-and-mouth disease virus infection in vaccinated Asian buffalo in Islamabad Capital*  
864 *Territory, Pakistan*. *Transbound Emerg Dis*, 2018. **65**(6): p. 1836-1850.
- 865 77. Lewis-Rogers, N., D.A. McClellan, and K.A. Crandall, *The evolution of foot-and-mouth*  
866 *disease virus: impacts of recombination and selection*. *Infect Genet Evol*, 2008. **8**(6): p.  
867 786-98.
- 868 78. Brito, B., et al., *A traditional evolutionary history of foot-and-mouth disease viruses in*  
869 *Southeast Asia challenged by analyses of non-structural protein coding sequences*.  
870 *Scientific Reports*, 2018. **8**(1).
- 871 79. Charleston, B., et al., *Relationship between clinical signs and transmission of an*  
872 *infectious disease and the implications for control*. *Science*, 2011. **332**(6030): p. 726-9.
- 873 80. Stenfeldt, C., et al., *Transmission of Foot-and-Mouth Disease Virus during the Incubation*  
874 *Period in Pigs*. *Front Vet Sci*, 2016. **3**: p. 105.
- 875 81. Tully, D.C. and M.A. Fares, *Shifts in the selection-drift balance drive the evolution and*  
876 *epidemiology of foot-and-mouth disease virus*. *J Virol*, 2009. **83**(2): p. 781-90.
- 877 82. Cottam, E.M., et al., *Analysis of Foot-and-mouth disease virus nucleotide sequence*  
878 *variation within naturally infected epithelium*. *Virus Res*, 2009. **140**(1-2): p. 199-204.
- 879 83. Suttmoller, P. and A. Gaggero, *Foot-and mouth diseases carriers*. *Vet Rec*, 1965. **77**(33):  
880 p. 968-9.
- 881 84. Paton, D.J., S. Gubbins, and D.P. King, *Understanding the transmission of foot-and-*  
882 *mouth disease virus at different scales*. *Curr Opin Virol*, 2018. **28**: p. 85-91.
- 883 85. LaRocco, M., et al., *A continuous bovine kidney cell line constitutively expressing bovine*  
884 *alphavbeta6 integrin has increased susceptibility to foot-and-mouth disease virus*. *J Clin*  
885 *Microbiol*, 2013. **51**(6): p. 1714-20.
- 886 86. Guindon, S., et al., *New algorithms and methods to estimate maximum-likelihood*  
887 *phylogenies: assessing the performance of PhyML 3.0*. *Syst Biol*, 2010. **59**(3): p. 307-21.
- 888 87. Kumar, S., G. Stecher, and K. Tamura, *MEGA7: Molecular Evolutionary Genetics Analysis*  
889 *Version 7.0 for Bigger Datasets*. *Mol Biol Evol*, 2016. **33**(7): p. 1870-4.
- 890 88. Kearse, M., et al., *Geneious Basic: an integrated and extendable desktop software*  
891 *platform for the organization and analysis of sequence data*. *Bioinformatics*, 2012.  
892 **28**(12): p. 1647-9.
- 893 89. Pond, S.L., S.D. Frost, and S.V. Muse, *HyPhy: hypothesis testing using phylogenies*.  
894 *Bioinformatics*, 2005. **21**(5): p. 676-9.

- 895 90. Warren, R.L., et al., *Assembling millions of short DNA sequences using SSAKE*.  
896 *Bioinformatics*, 2007. **23**(4): p. 500-1.
- 897 91. Pettersen, E.F., et al., *UCSF Chimera--a visualization system for exploratory research and*  
898 *analysis*. *J Comput Chem*, 2004. **25**(13): p. 1605-12.
- 899

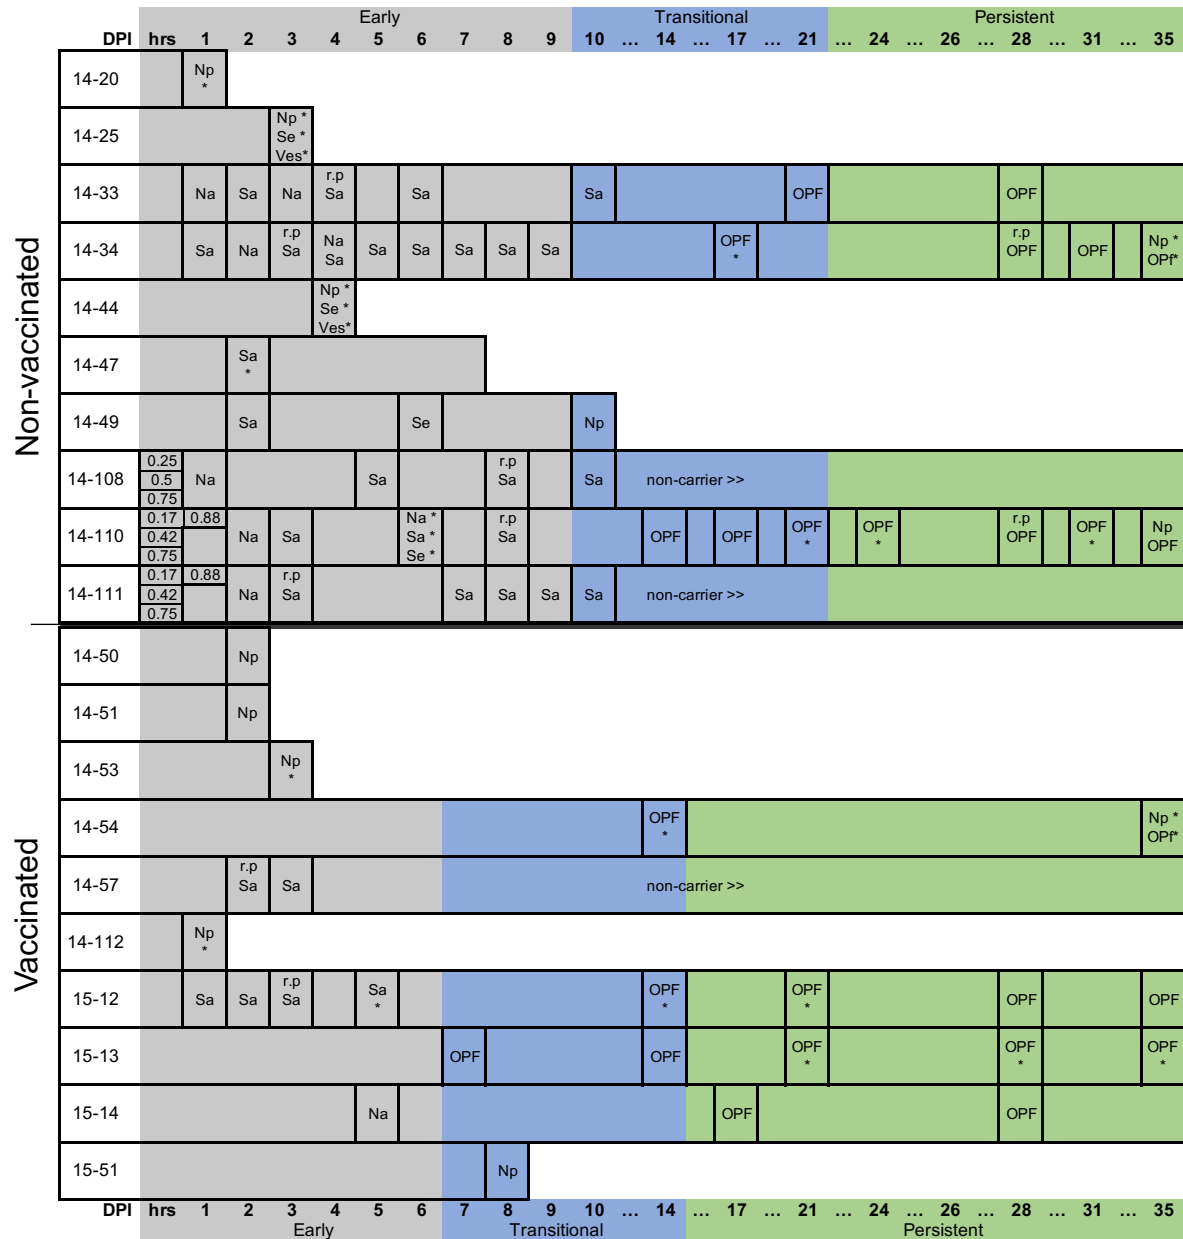

**Figure S1.** Experimental design: sequenced sample sources and times. Naïve cattle above center black line and vaccinated below. Abbreviations: hrs - fraction of first 24 hours (all nasal secretions), dpi – days post infection, Na – nasal secretion, Np – nasopharyngeal tissue (necropsy), OPF – oropharyngeal fluid, Sa – saliva, Se – serum, Ves – epithelial vesicle, r.p – both passaged and un-passaged samples were sequenced. \* - consensus sequence available only (no deep sequencing data).

|                | Early Subs Rate - Naïve                 |                    |          | Transitional Subs Rate - Naïve      |             |          | Persistent Subs Rate - Naïve      |                    |          |
|----------------|-----------------------------------------|--------------------|----------|-------------------------------------|-------------|----------|-----------------------------------|--------------------|----------|
|                | All Subs                                | Nonsyn Subs        | Syn Subs | All Subs                            | Nonsyn Subs | Syn Subs | All Subs                          | Nonsyn Subs        | Syn Subs |
| subs/day       | 3.61 <sup>a</sup>                       | 1.52 <sup>b</sup>  | 2.14     | 2.44                                | 0.70        | 1.74     | 1.54 <sup>a</sup>                 | 0.28 <sup>b</sup>  | 1.27     |
| subs/site/year | 0.188 <sup>a</sup>                      | 0.079 <sup>b</sup> | 0.111    | 0.127                               | 0.037       | 0.091    | 0.080 <sup>a</sup>                | 0.014 <sup>b</sup> | 0.066    |
|                | Early Subs Rate - Vaccinated            |                    |          | Transitional Subs Rate - Vaccinated |             |          | Persistent Subs Rate - Vaccinated |                    |          |
| subs/day       | 2.51                                    | 1.07               | 1.43     | 1.70                                | 0.73        | 0.97     | 1.52                              | 0.49               | 1.03     |
| subs/site/year | 0.131                                   | 0.056              | 0.075    | 0.089                               | 0.038       | 0.050    | 0.079                             | 0.026              | 0.054    |
|                | Trans-Persistent Subs Rate - Naïve      |                    |          | 1-10 dpi Subs Rates - Terminators   |             |          |                                   |                    |          |
|                | All Subs                                | Nonsyn Subs        | Syn Subs | All Subs                            | Nonsyn Subs | Syn Subs | All Subs                          | Nonsyn Subs        | Syn Subs |
| subs/day       | 1.90                                    | 0.46               | 1.44     | 4.29                                | 1.92        | 2.50     |                                   |                    |          |
| subs/site/year | 0.099                                   | 0.024              | 0.075    | 0.224                               | 0.100       | 0.131    |                                   |                    |          |
|                | Trans-Persistent Subs Rate - Vaccinated |                    |          | 1-10 dpi Subs Rates - Carriers      |             |          |                                   |                    |          |
| subs/day       | 1.53                                    | 0.54               | 0.99     | 3.47                                | 1.45        | 2.02     |                                   |                    |          |
| subs/site/year | 0.080                                   | 0.028              | 0.051    | 0.181                               | 0.076       | 0.105    |                                   |                    |          |

**Figure S2.** Pairwise differences: Vaccinated vs. Naïve, Carriers vs. Terminators. The number of consensus-level pairwise differences between each sample and the preceding sample (inoculum = 0 dpi) divided by intervening time within each animal. Pairwise values from 0.25 - 0.88 dpi and animals of unknown carrier status omitted. For instances of samples with same dpi - same animal (different tissue) and where both raw and passaged were sequenced, pairwise differences were averaged. <sup>a</sup> = P < 0.05 and <sup>b</sup> = P < 0.005.
